# Supplementary material
Source: PubMed Central journal article supplement (PMC2734116)
Supplement: djn512_10.pdf [file djn512_10.pdf]

### IPA Node Types

- 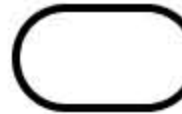 Chemical or Drug
-  Cytokine
-  Enzyme
-  G-protein Coupled Receptor
-  Group or Complex
-  Growth Factor
-  Ion Channel
-  Kinase
-  Ligand-dependent Nuclear Receptor
-  Peptidase
-  Phosphatase
-  Transcription Regulator
-  Translation Regulator
-  Transmembrane Receptor
-  Transporter
-  Other

### IPA Edge Types

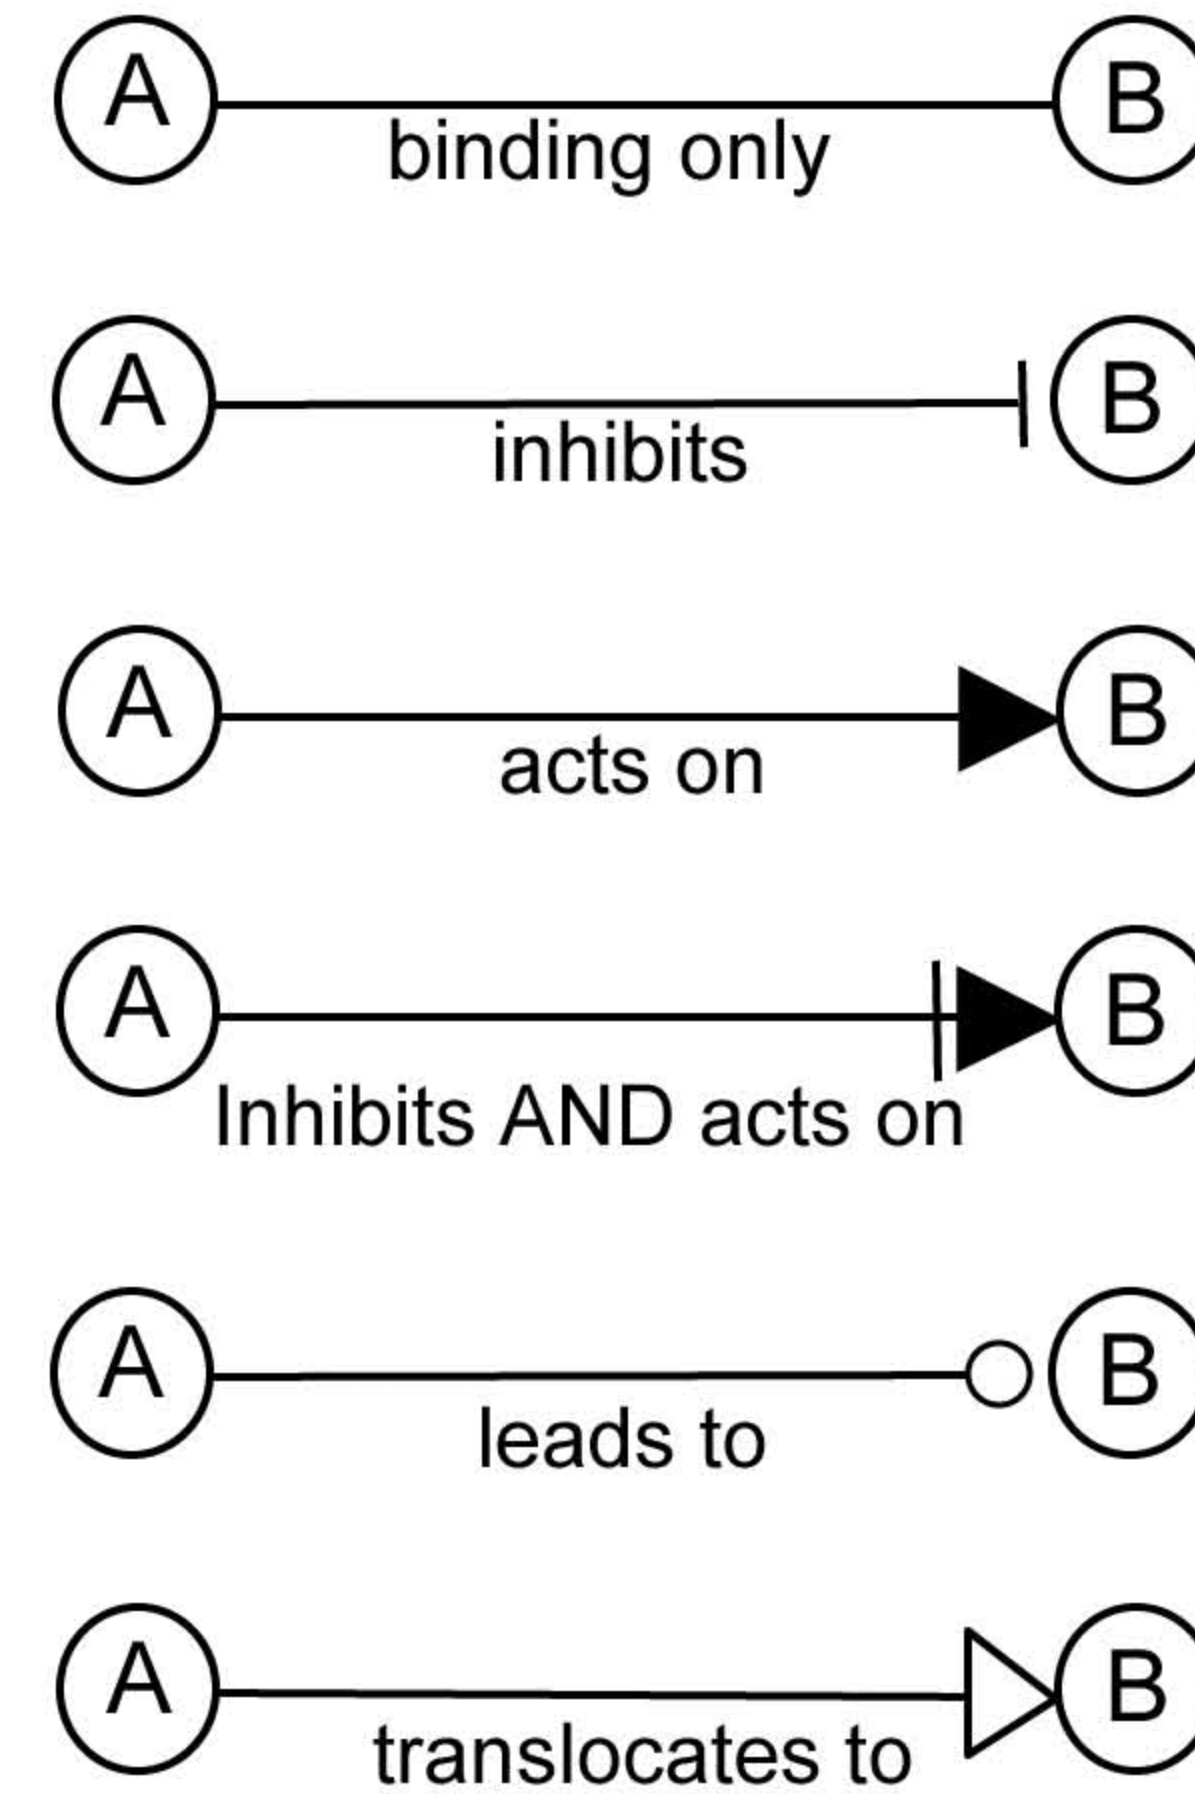

**Note:** “Acts on” and “Inhibits” edge may also include a binding event.

**—————**  
direct interaction

**- - - - -**  
indirect interaction

Suppl.Fig.9: Explanation of the node shapes and types of interactions in the networks of Suppl. Figs.3-8
