# Supplementary material
Source: PubMed Central journal article supplement (PMC2734116)

Pearson Coefficient

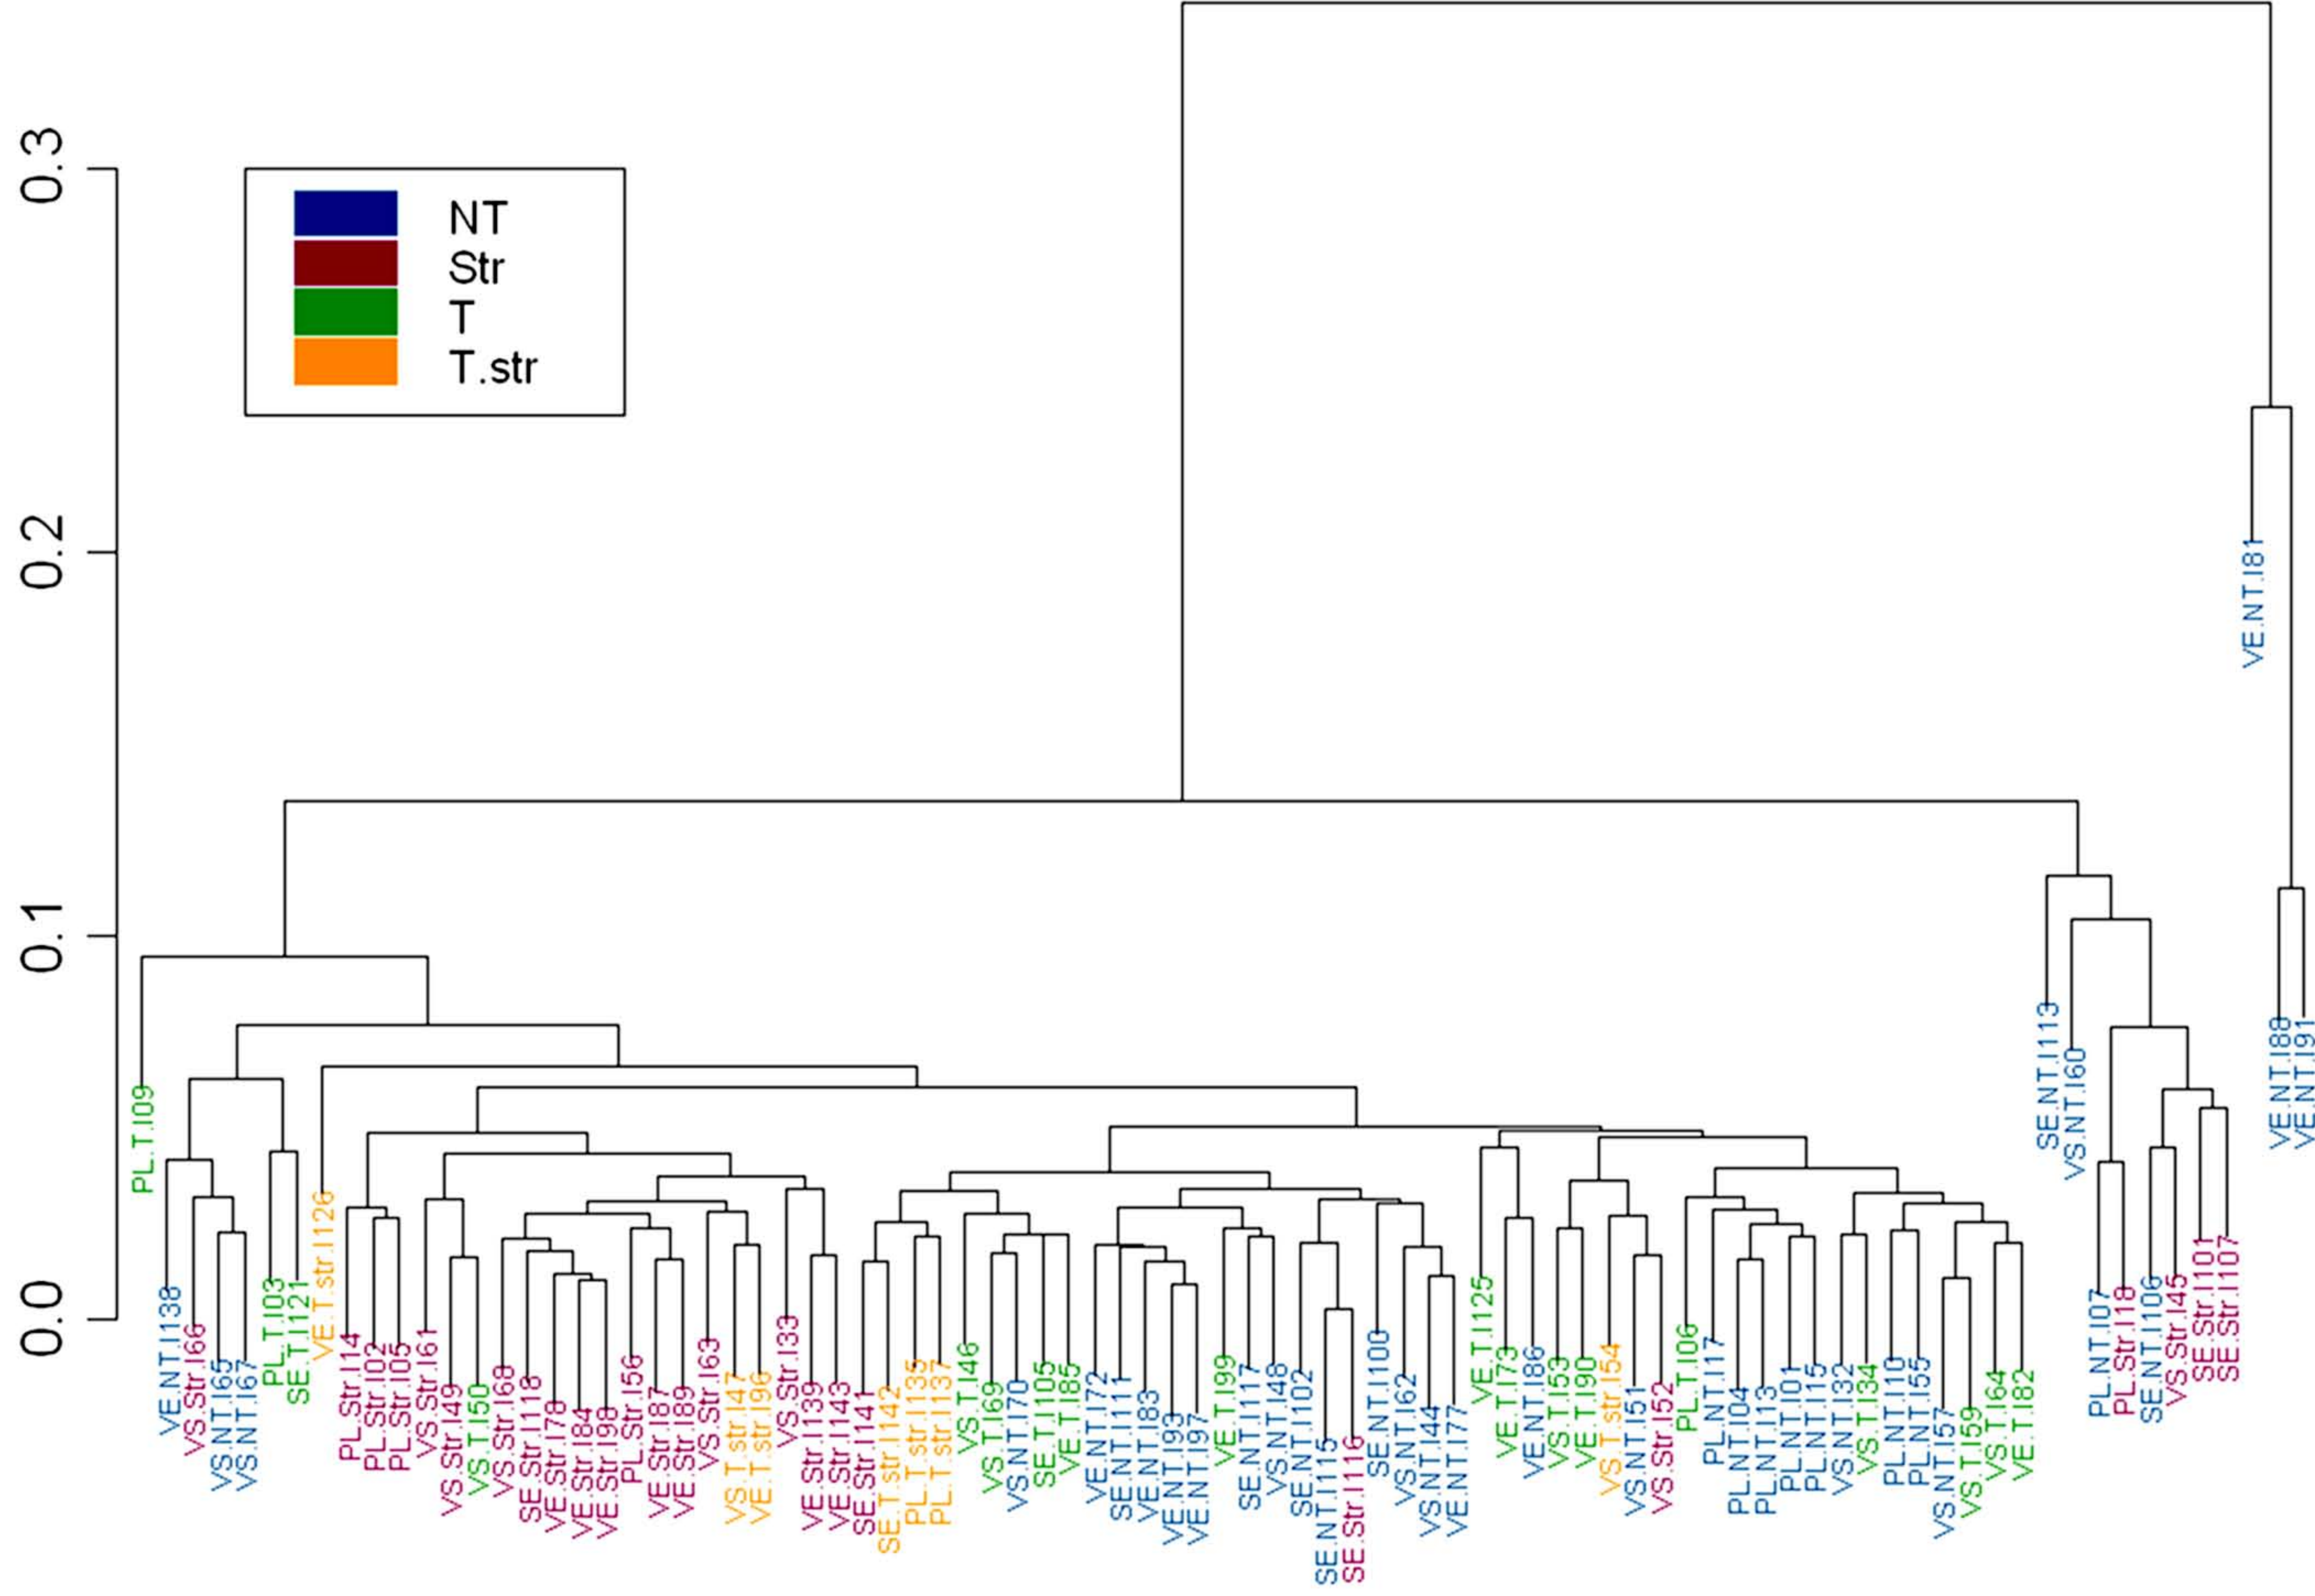

Supplement: djn512_2.pdf [file djn512_2.pdf]

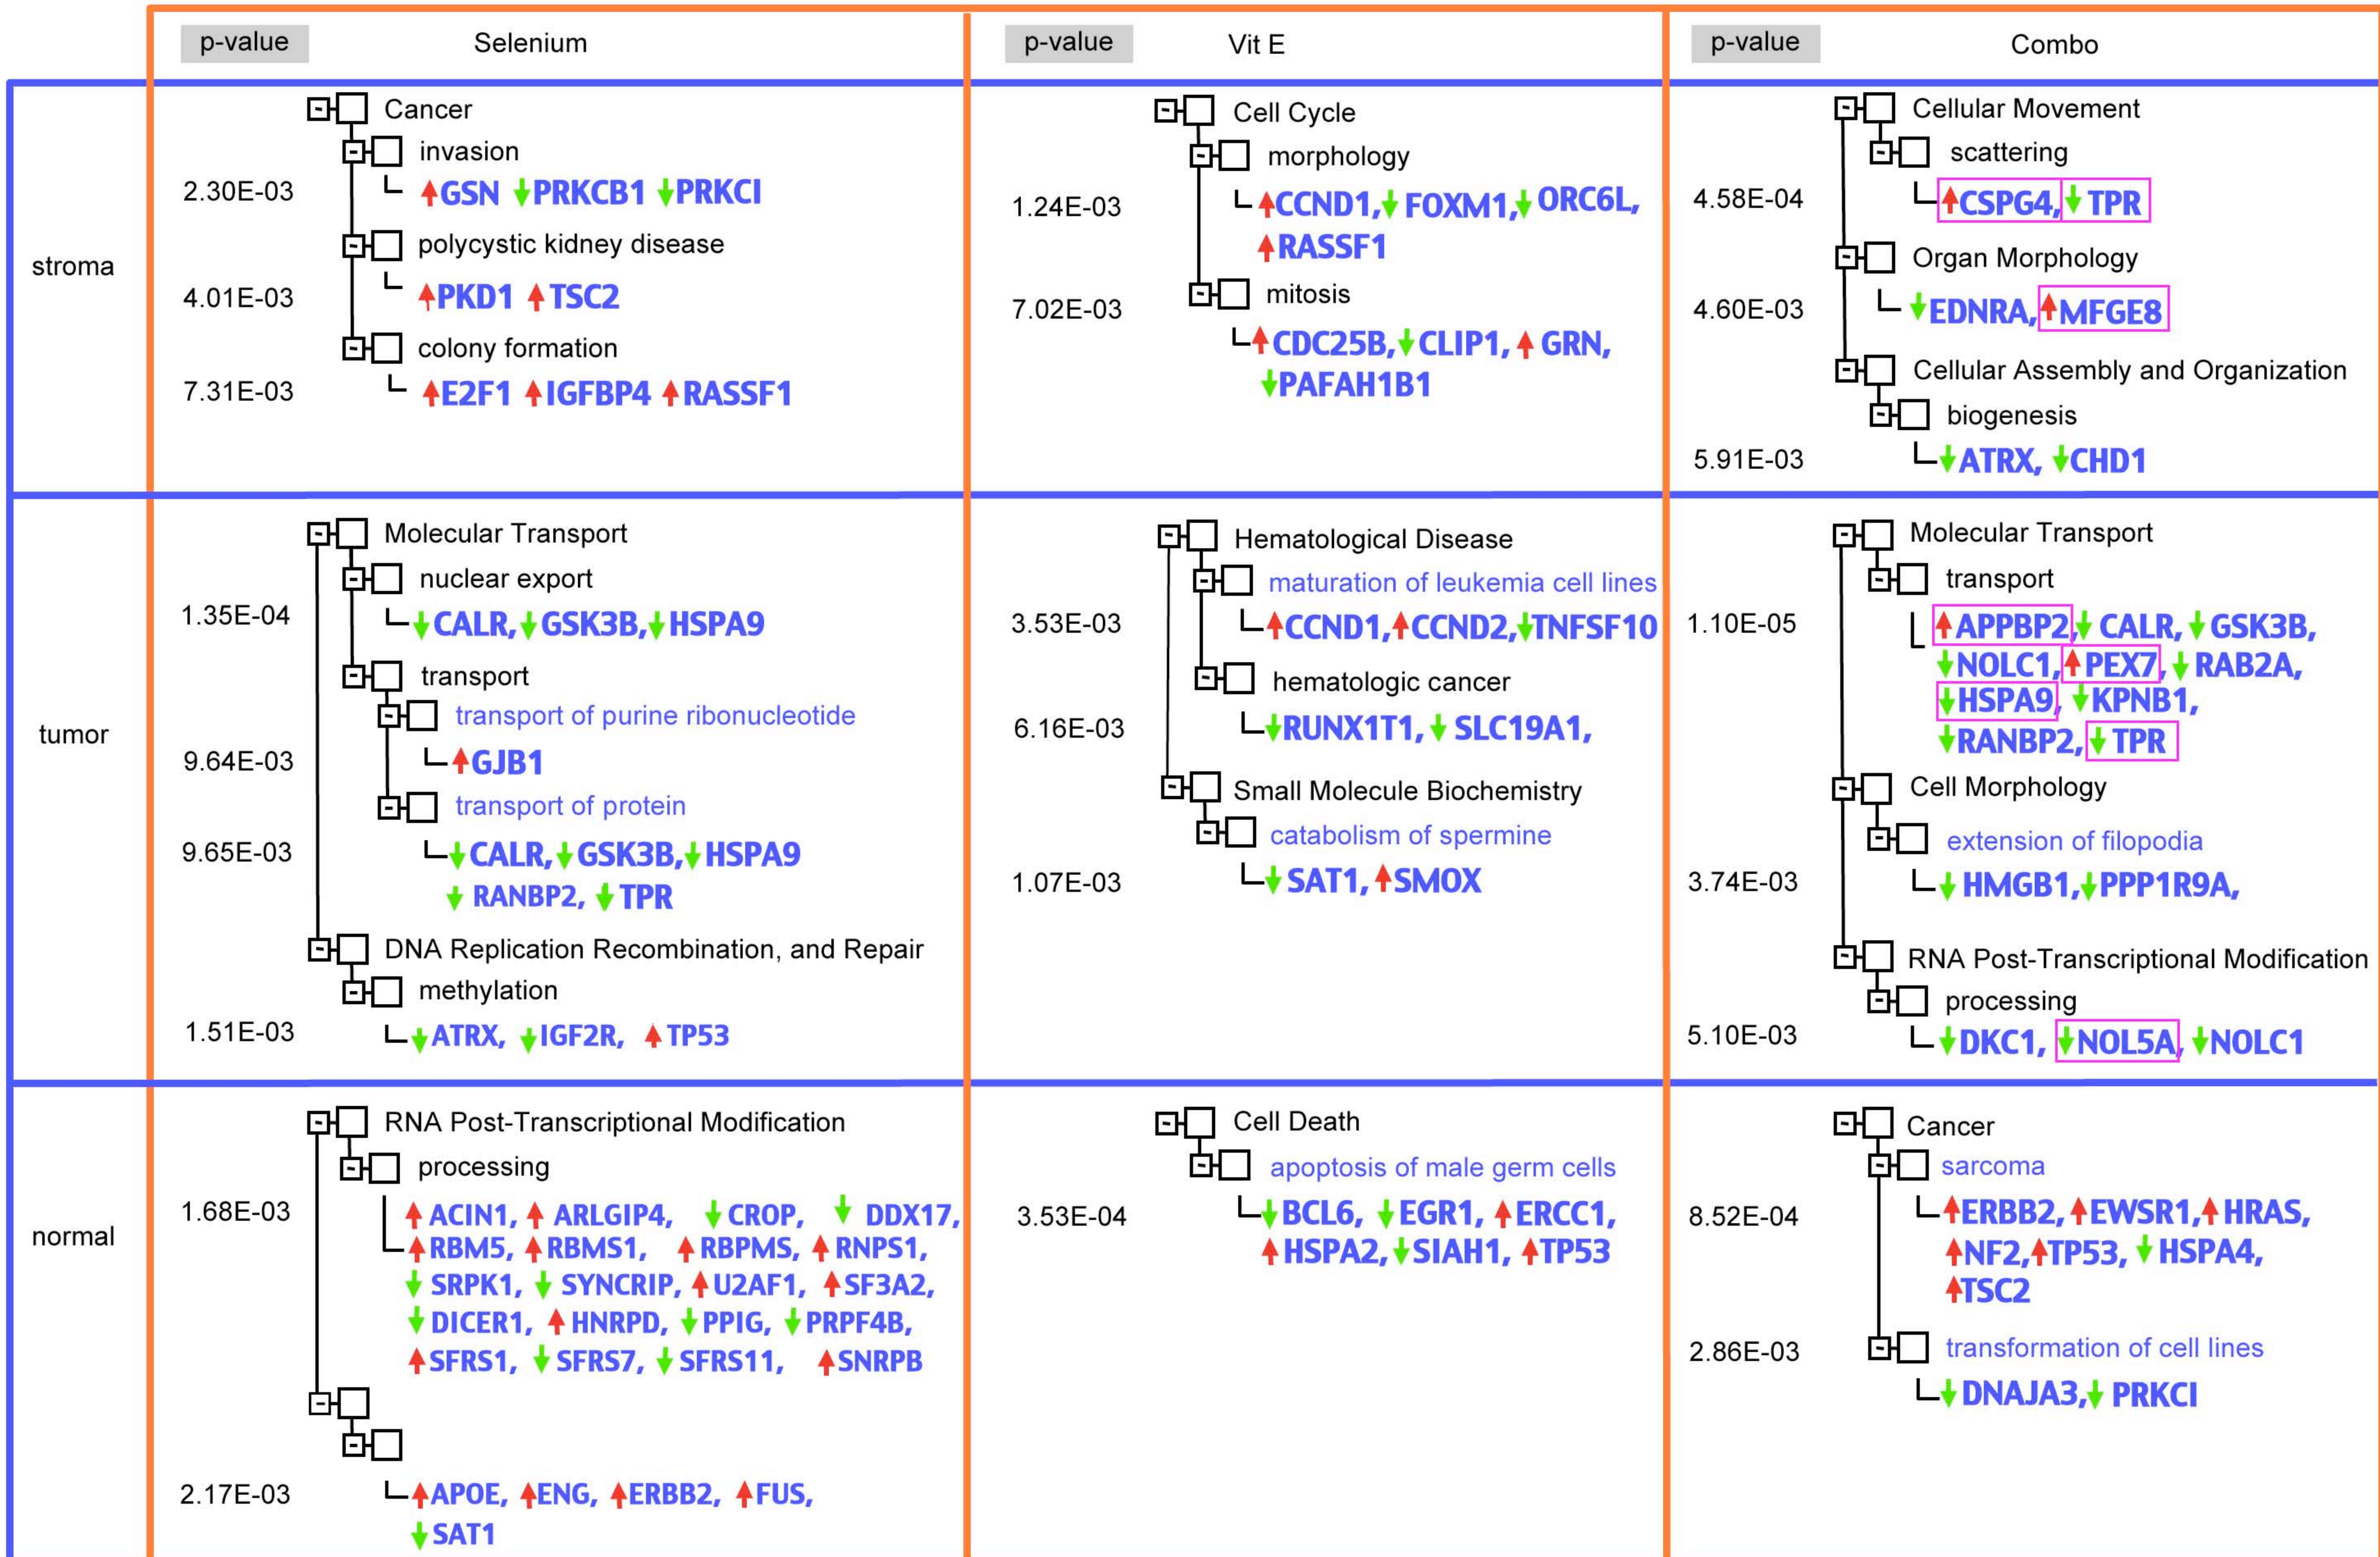

Suppl.Fig.2: Gene ontology categories of differentially expressed genes

Supplement: djn512_3.pdf [file djn512_3.pdf]

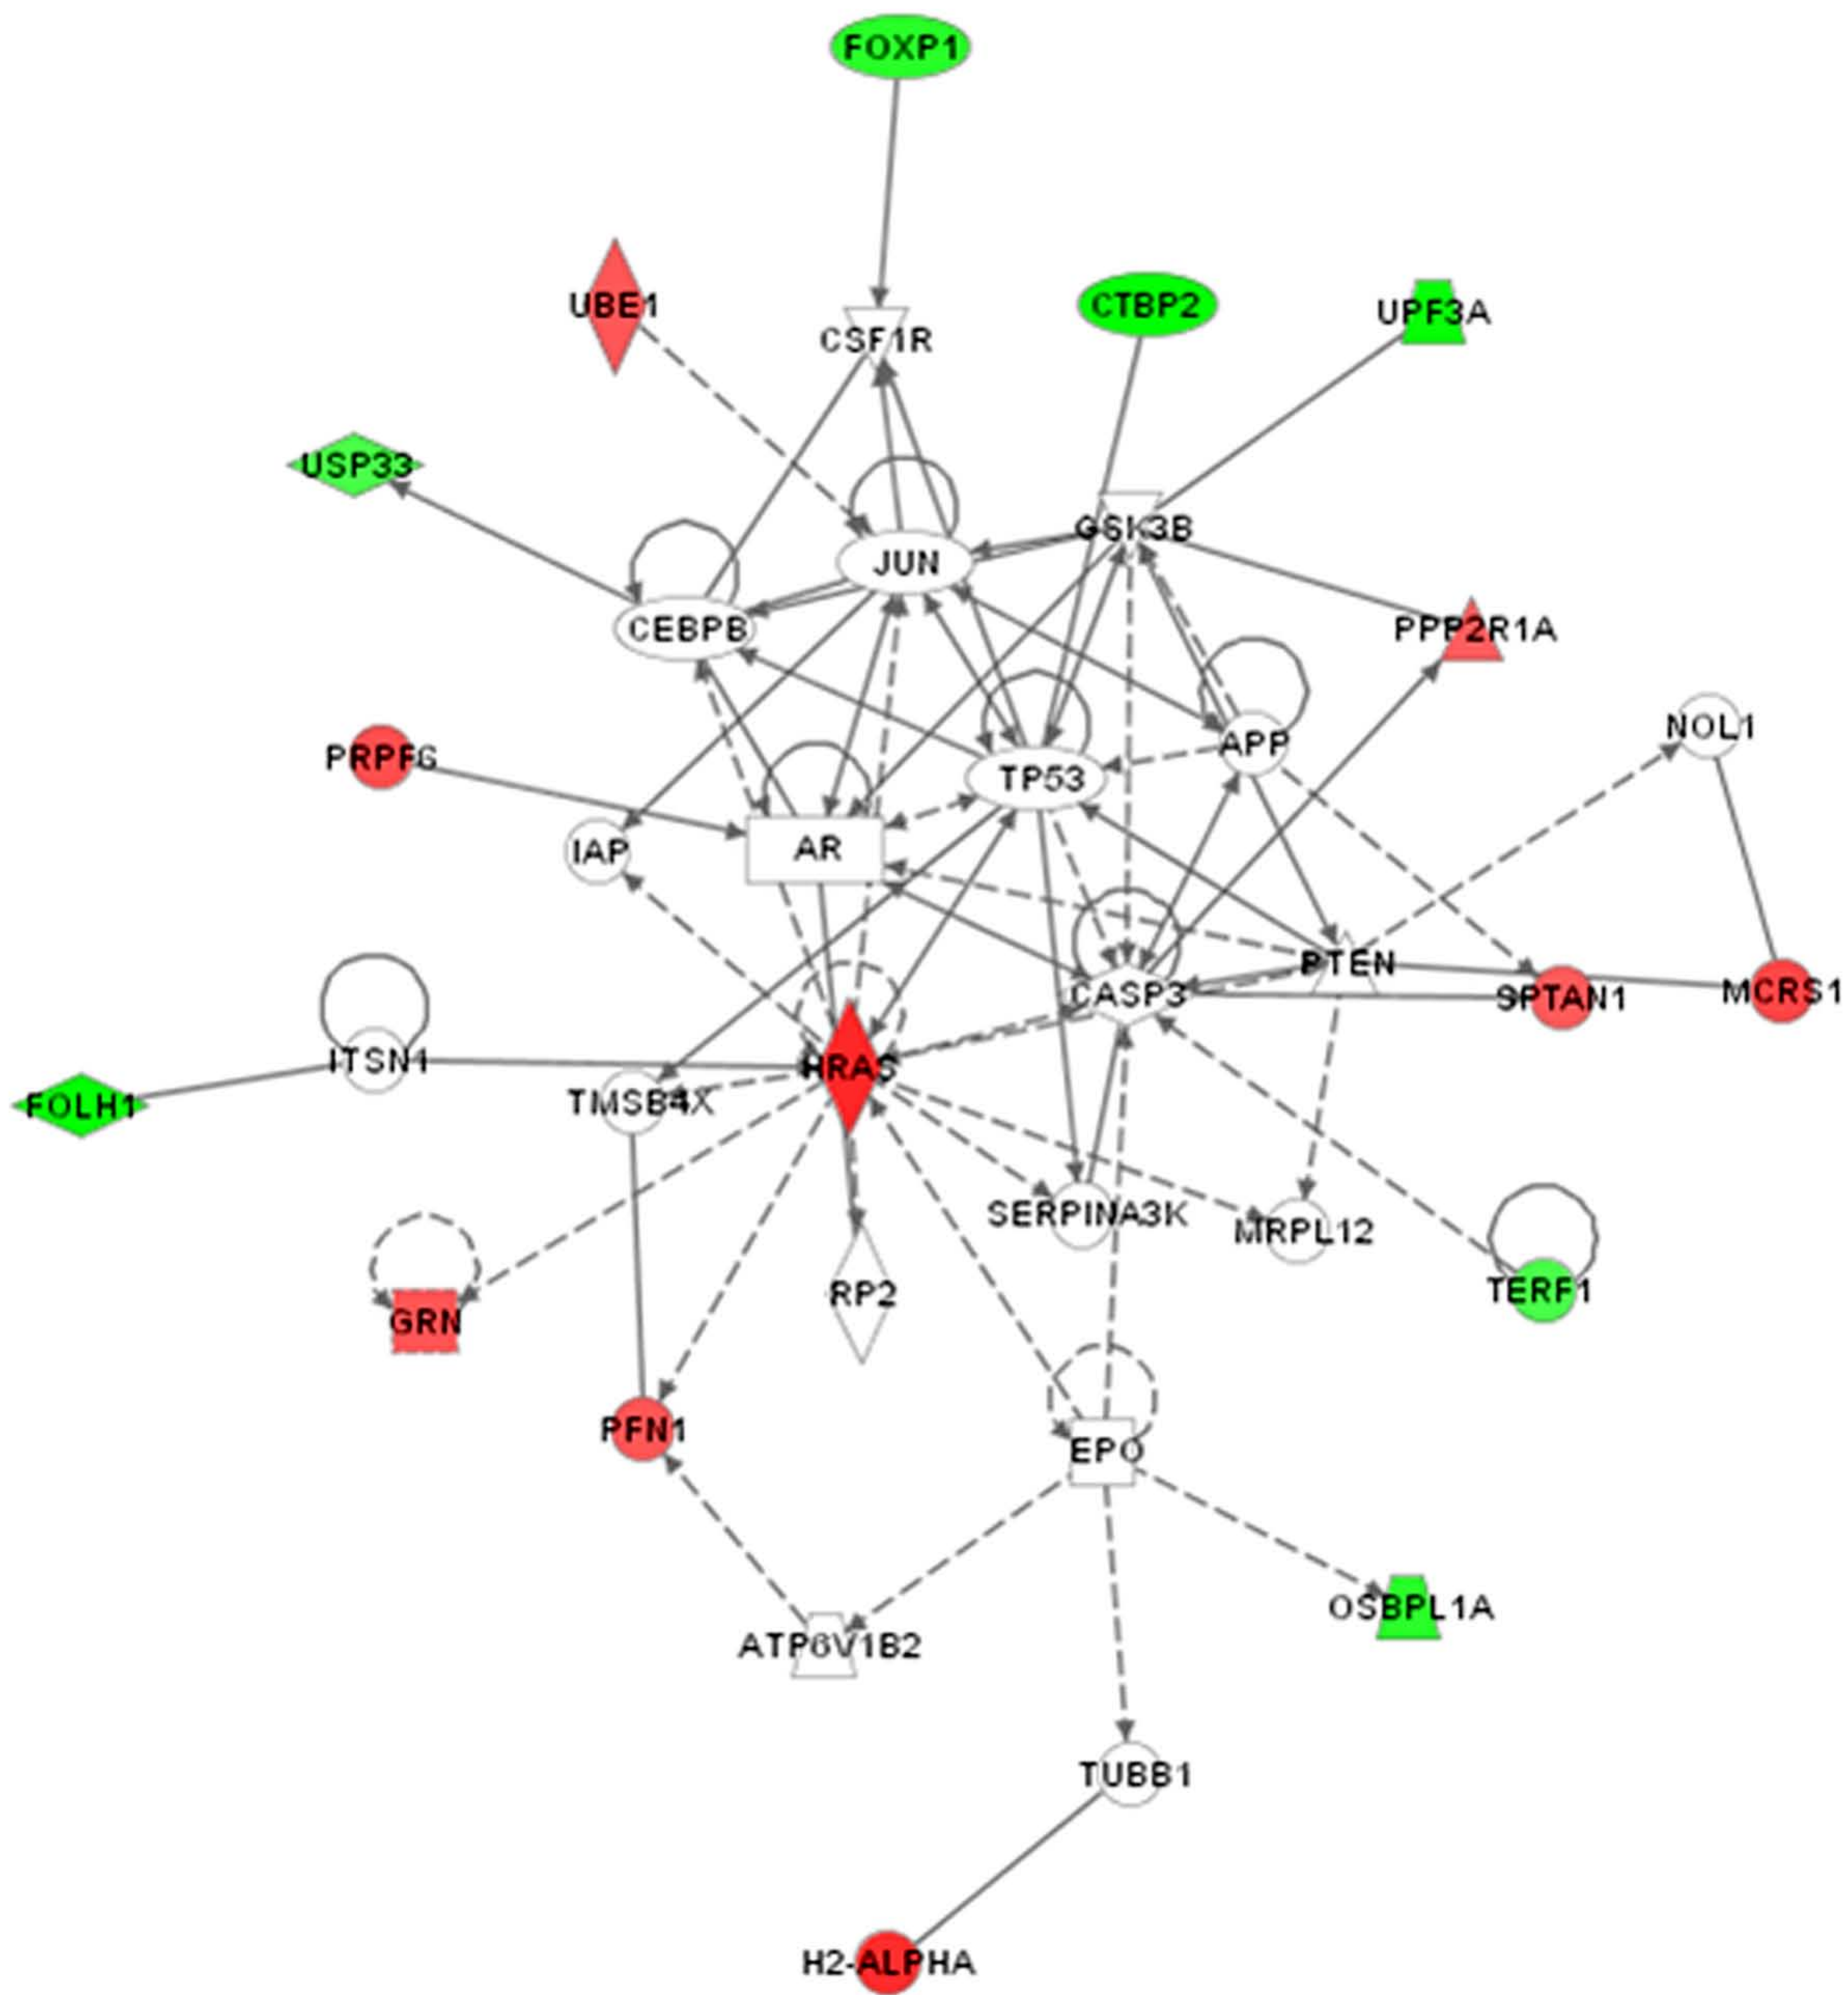

Suppl.Fig.3: Gene network found common in selenium- and combination-treated normal samples

Supplement: djn512_4.pdf [file djn512_4.pdf]

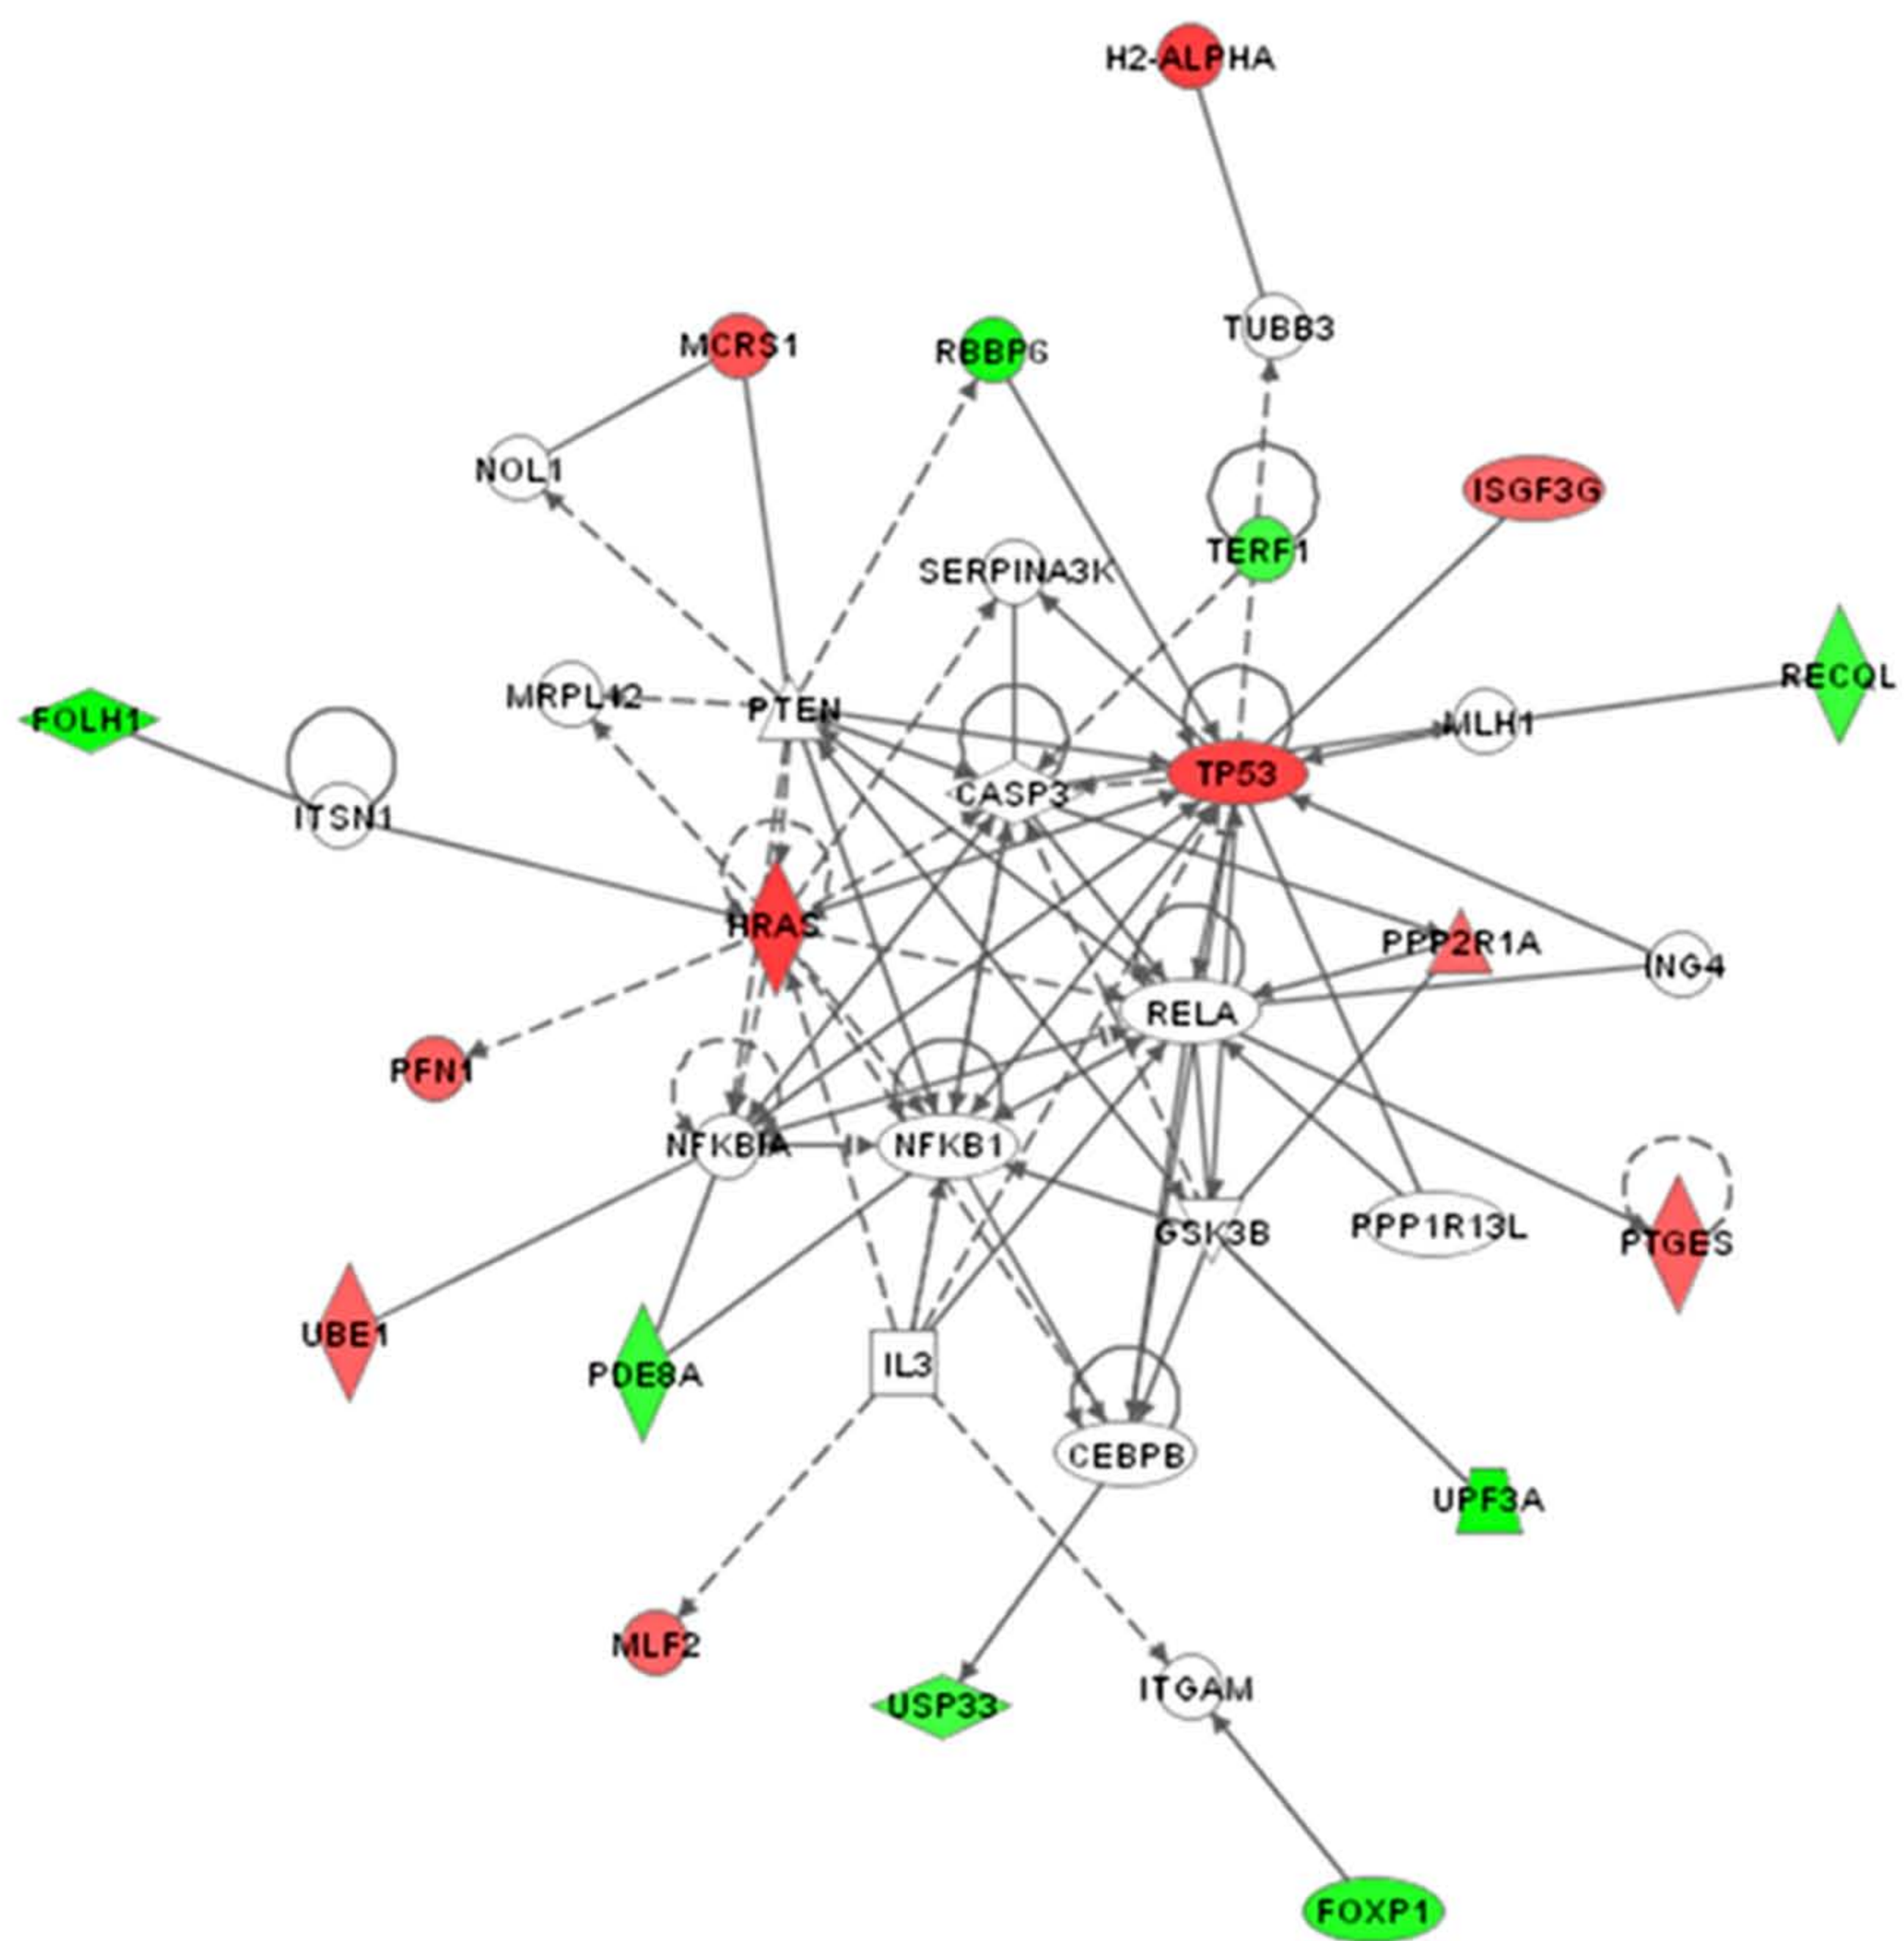

Suppl. Fig.4: Gene network found common in vitamin E- and combination-treated normal samples

Supplement: djn512_5.pdf [file djn512_5.pdf]

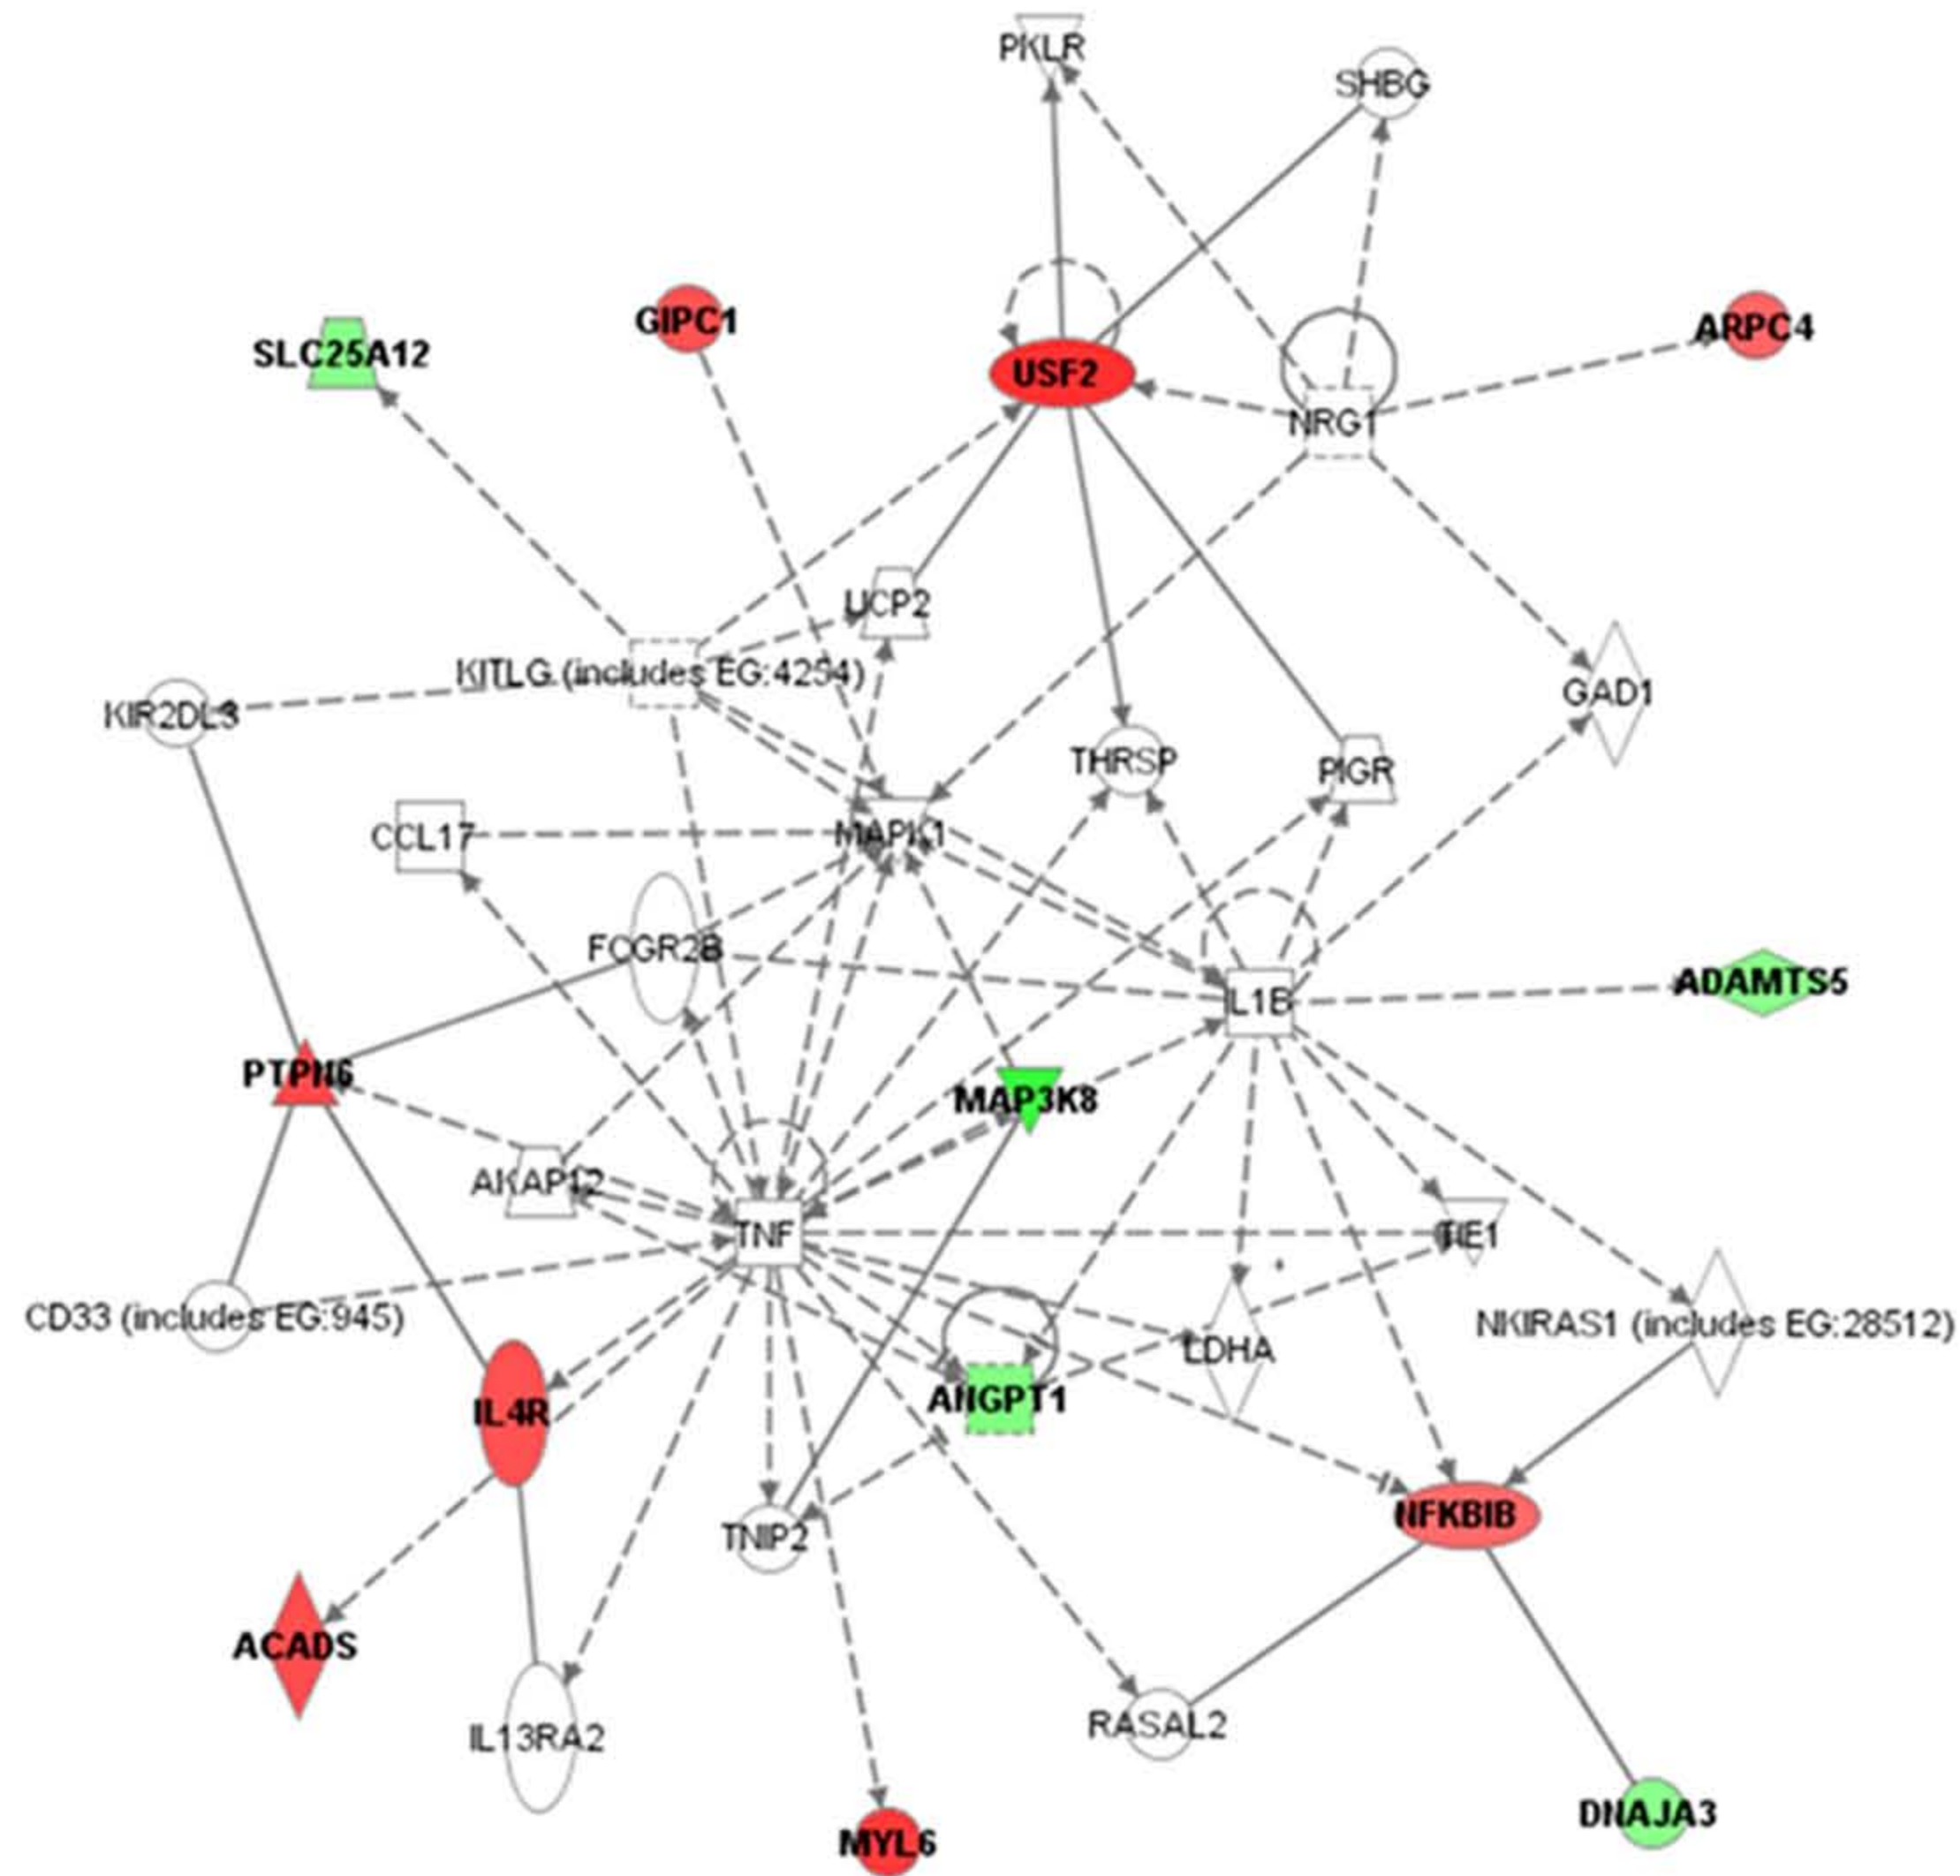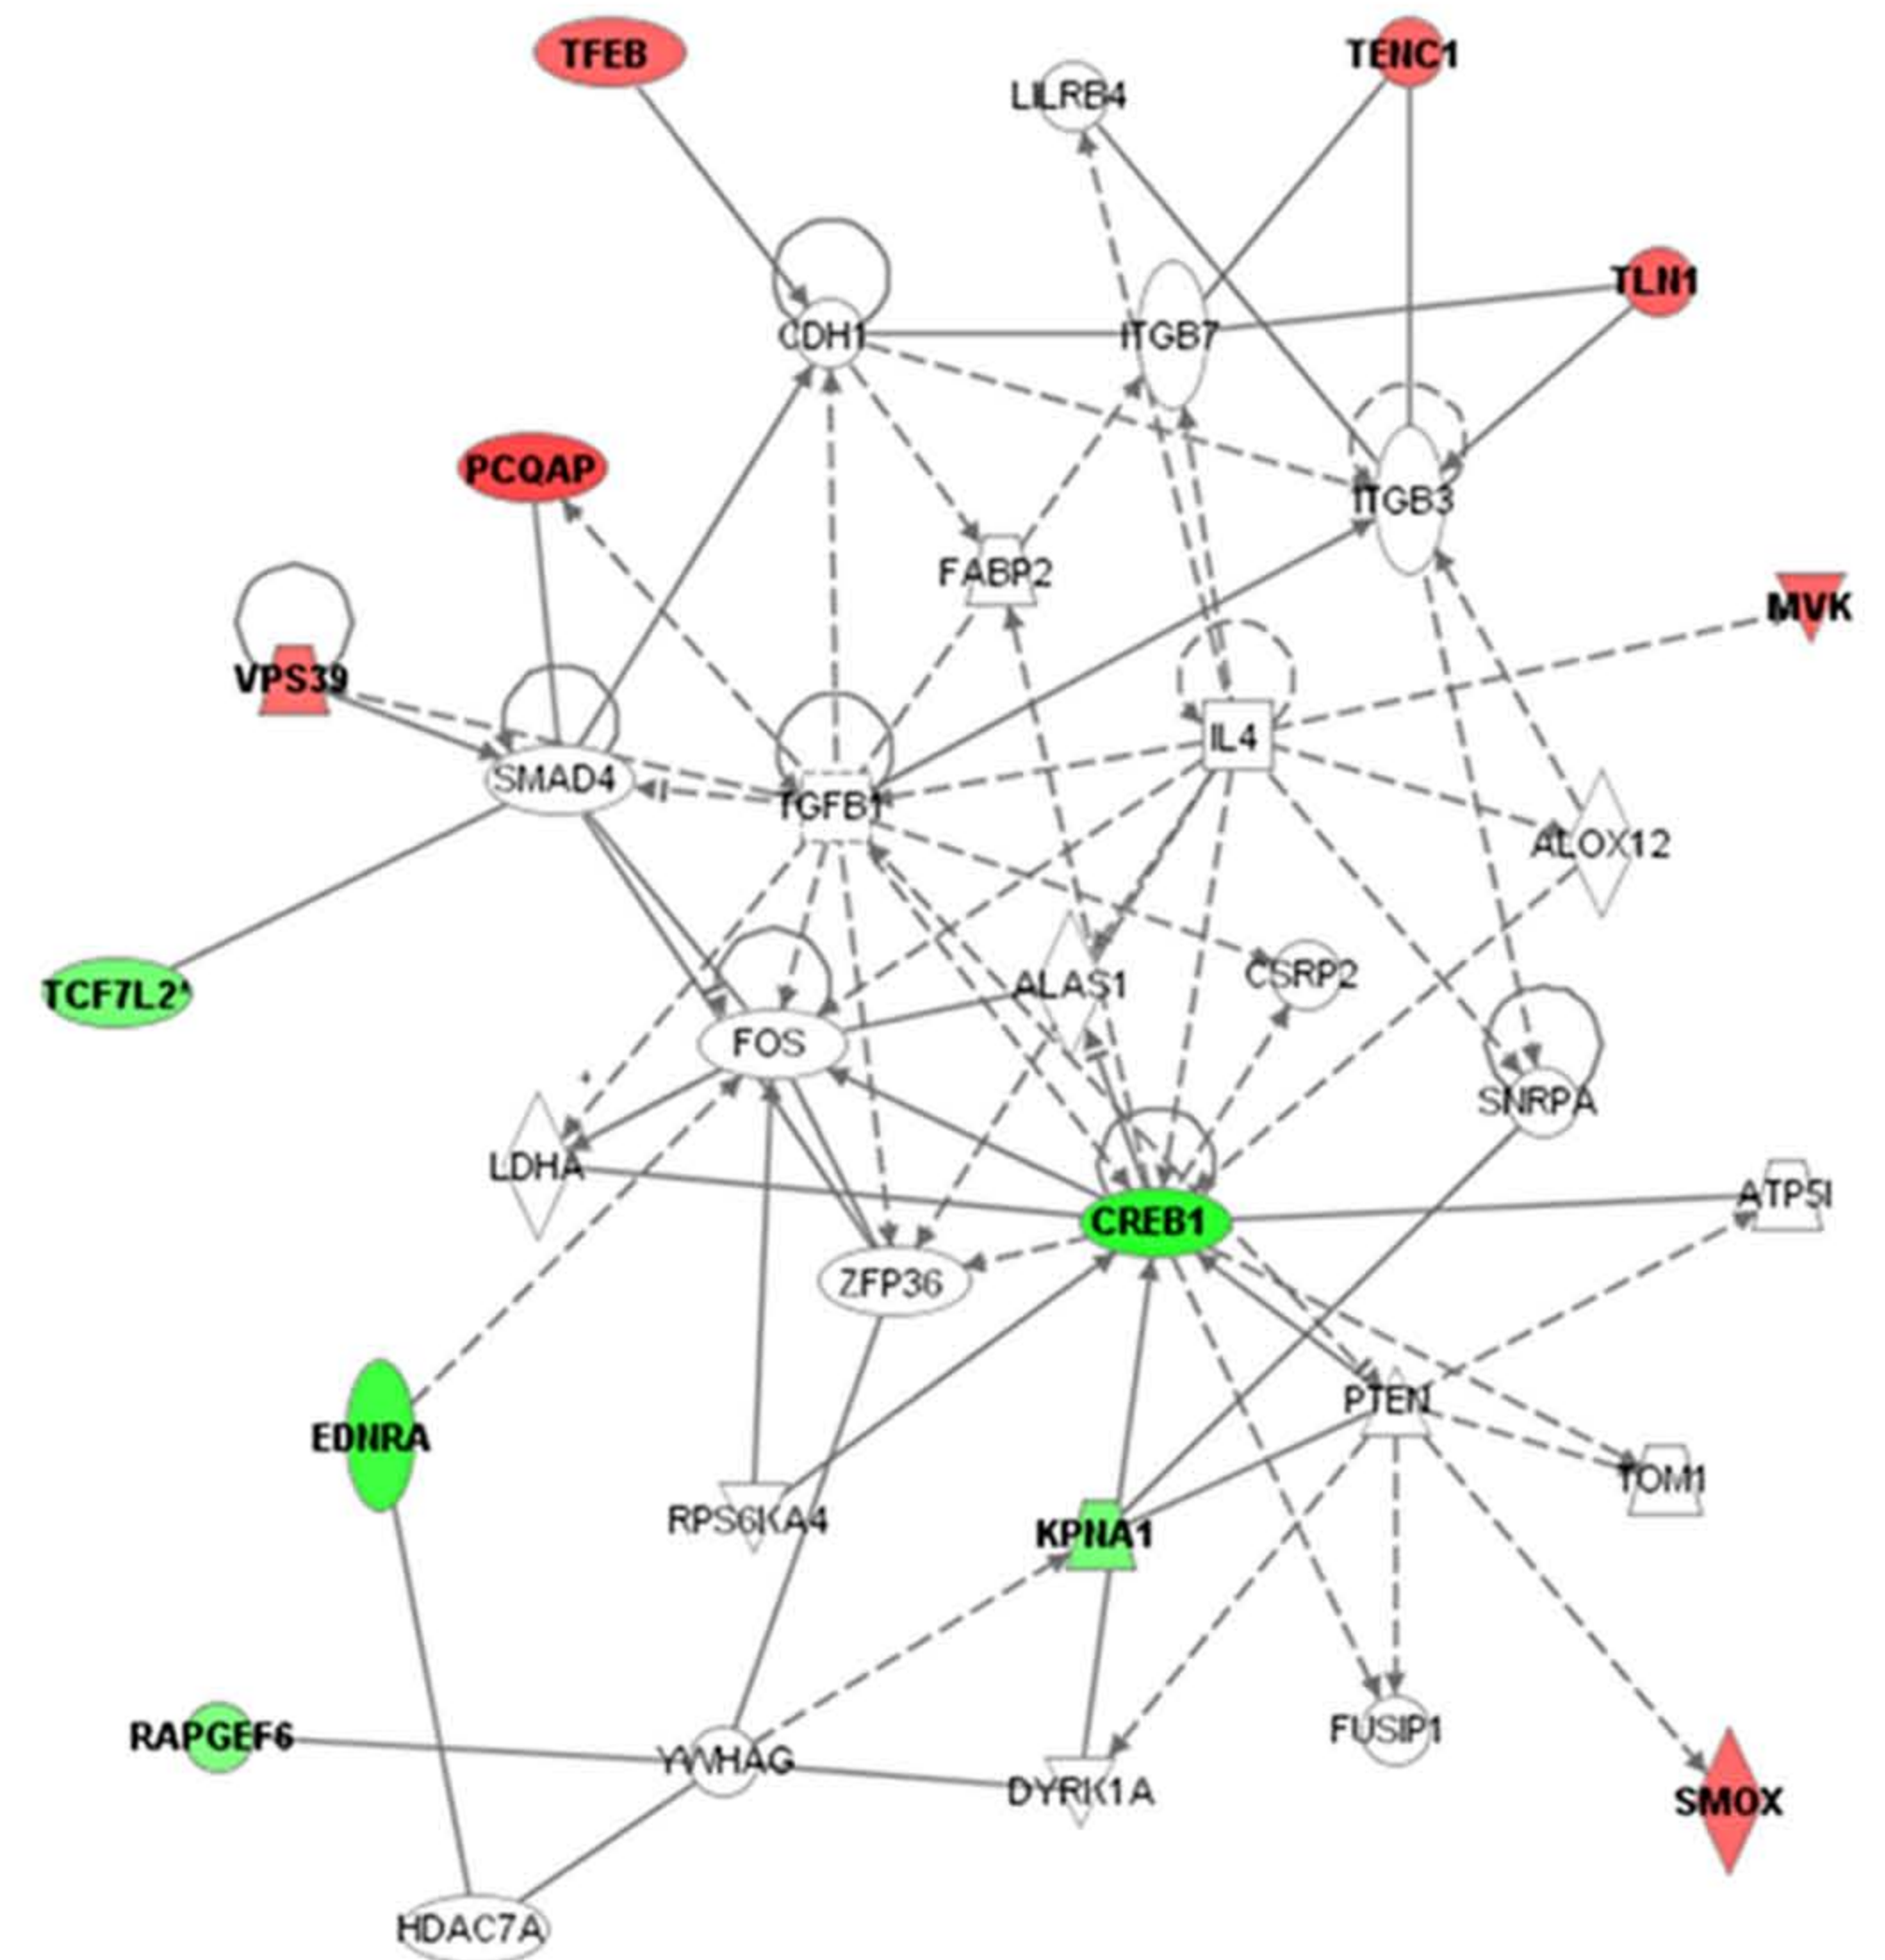

Suppl. Fig.5: Gene networks common in selenium- and combination-treated stromal samples

Supplement: djn512_6.pdf [file djn512_6.pdf]

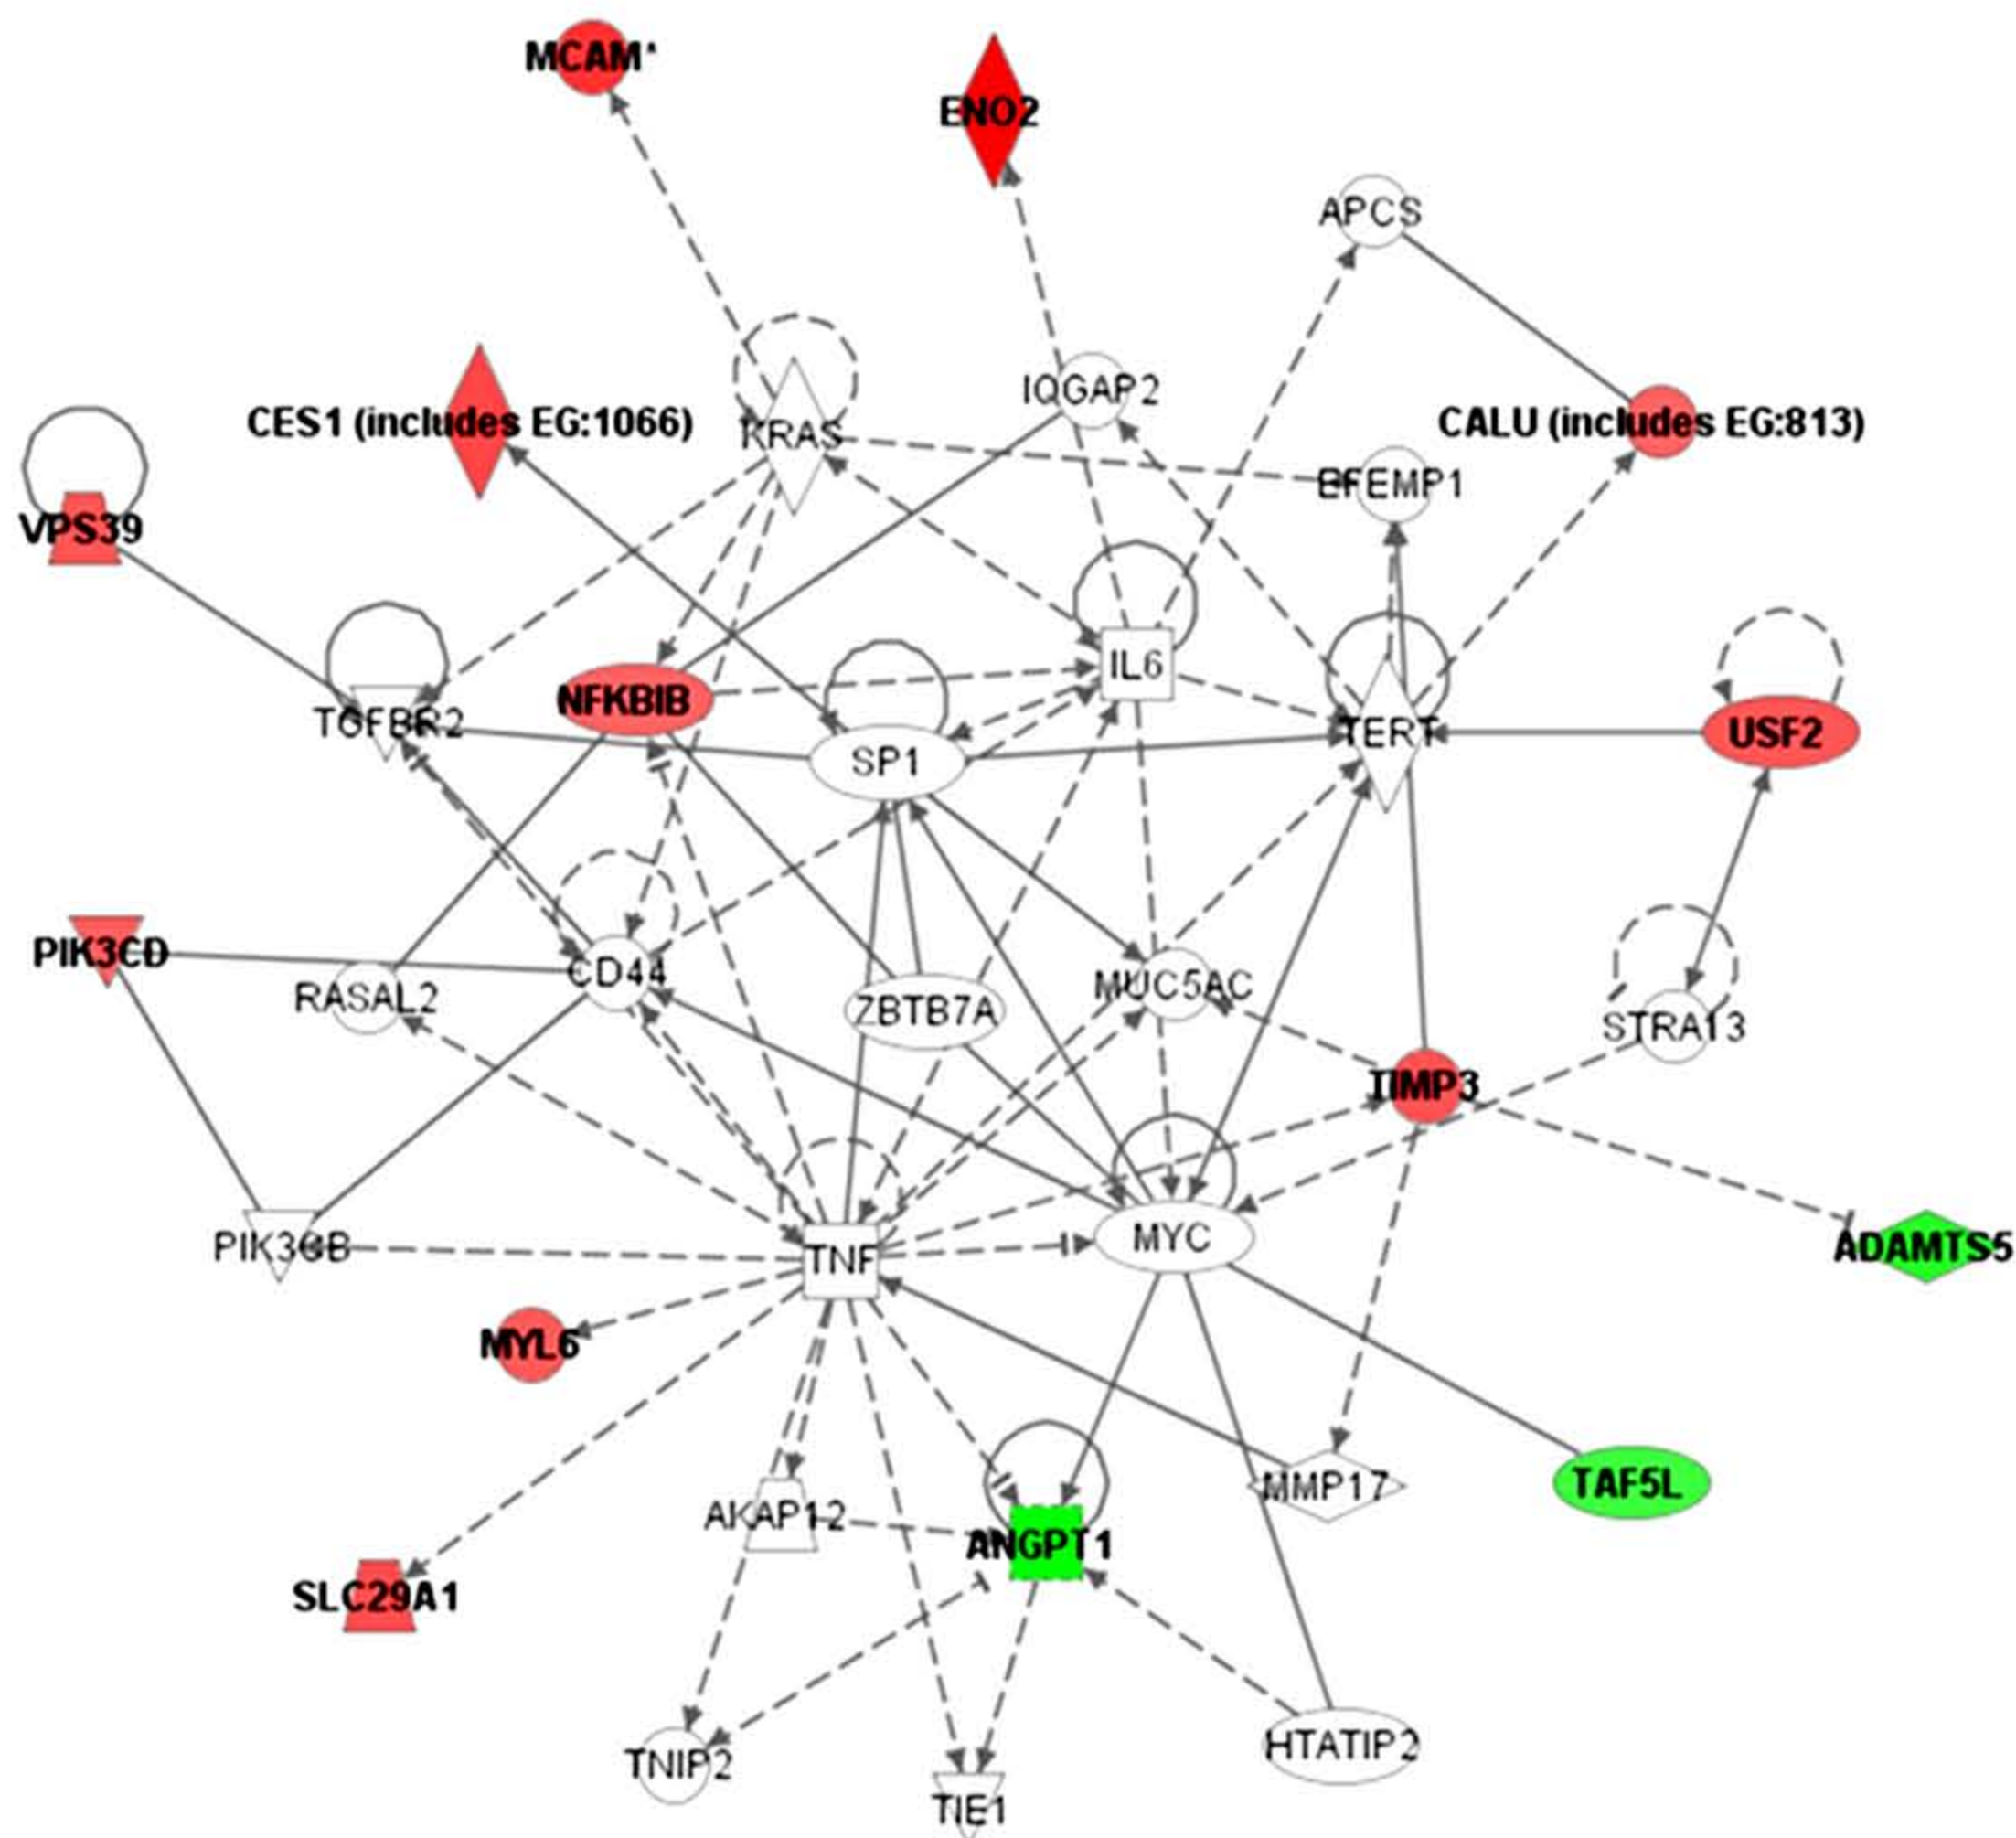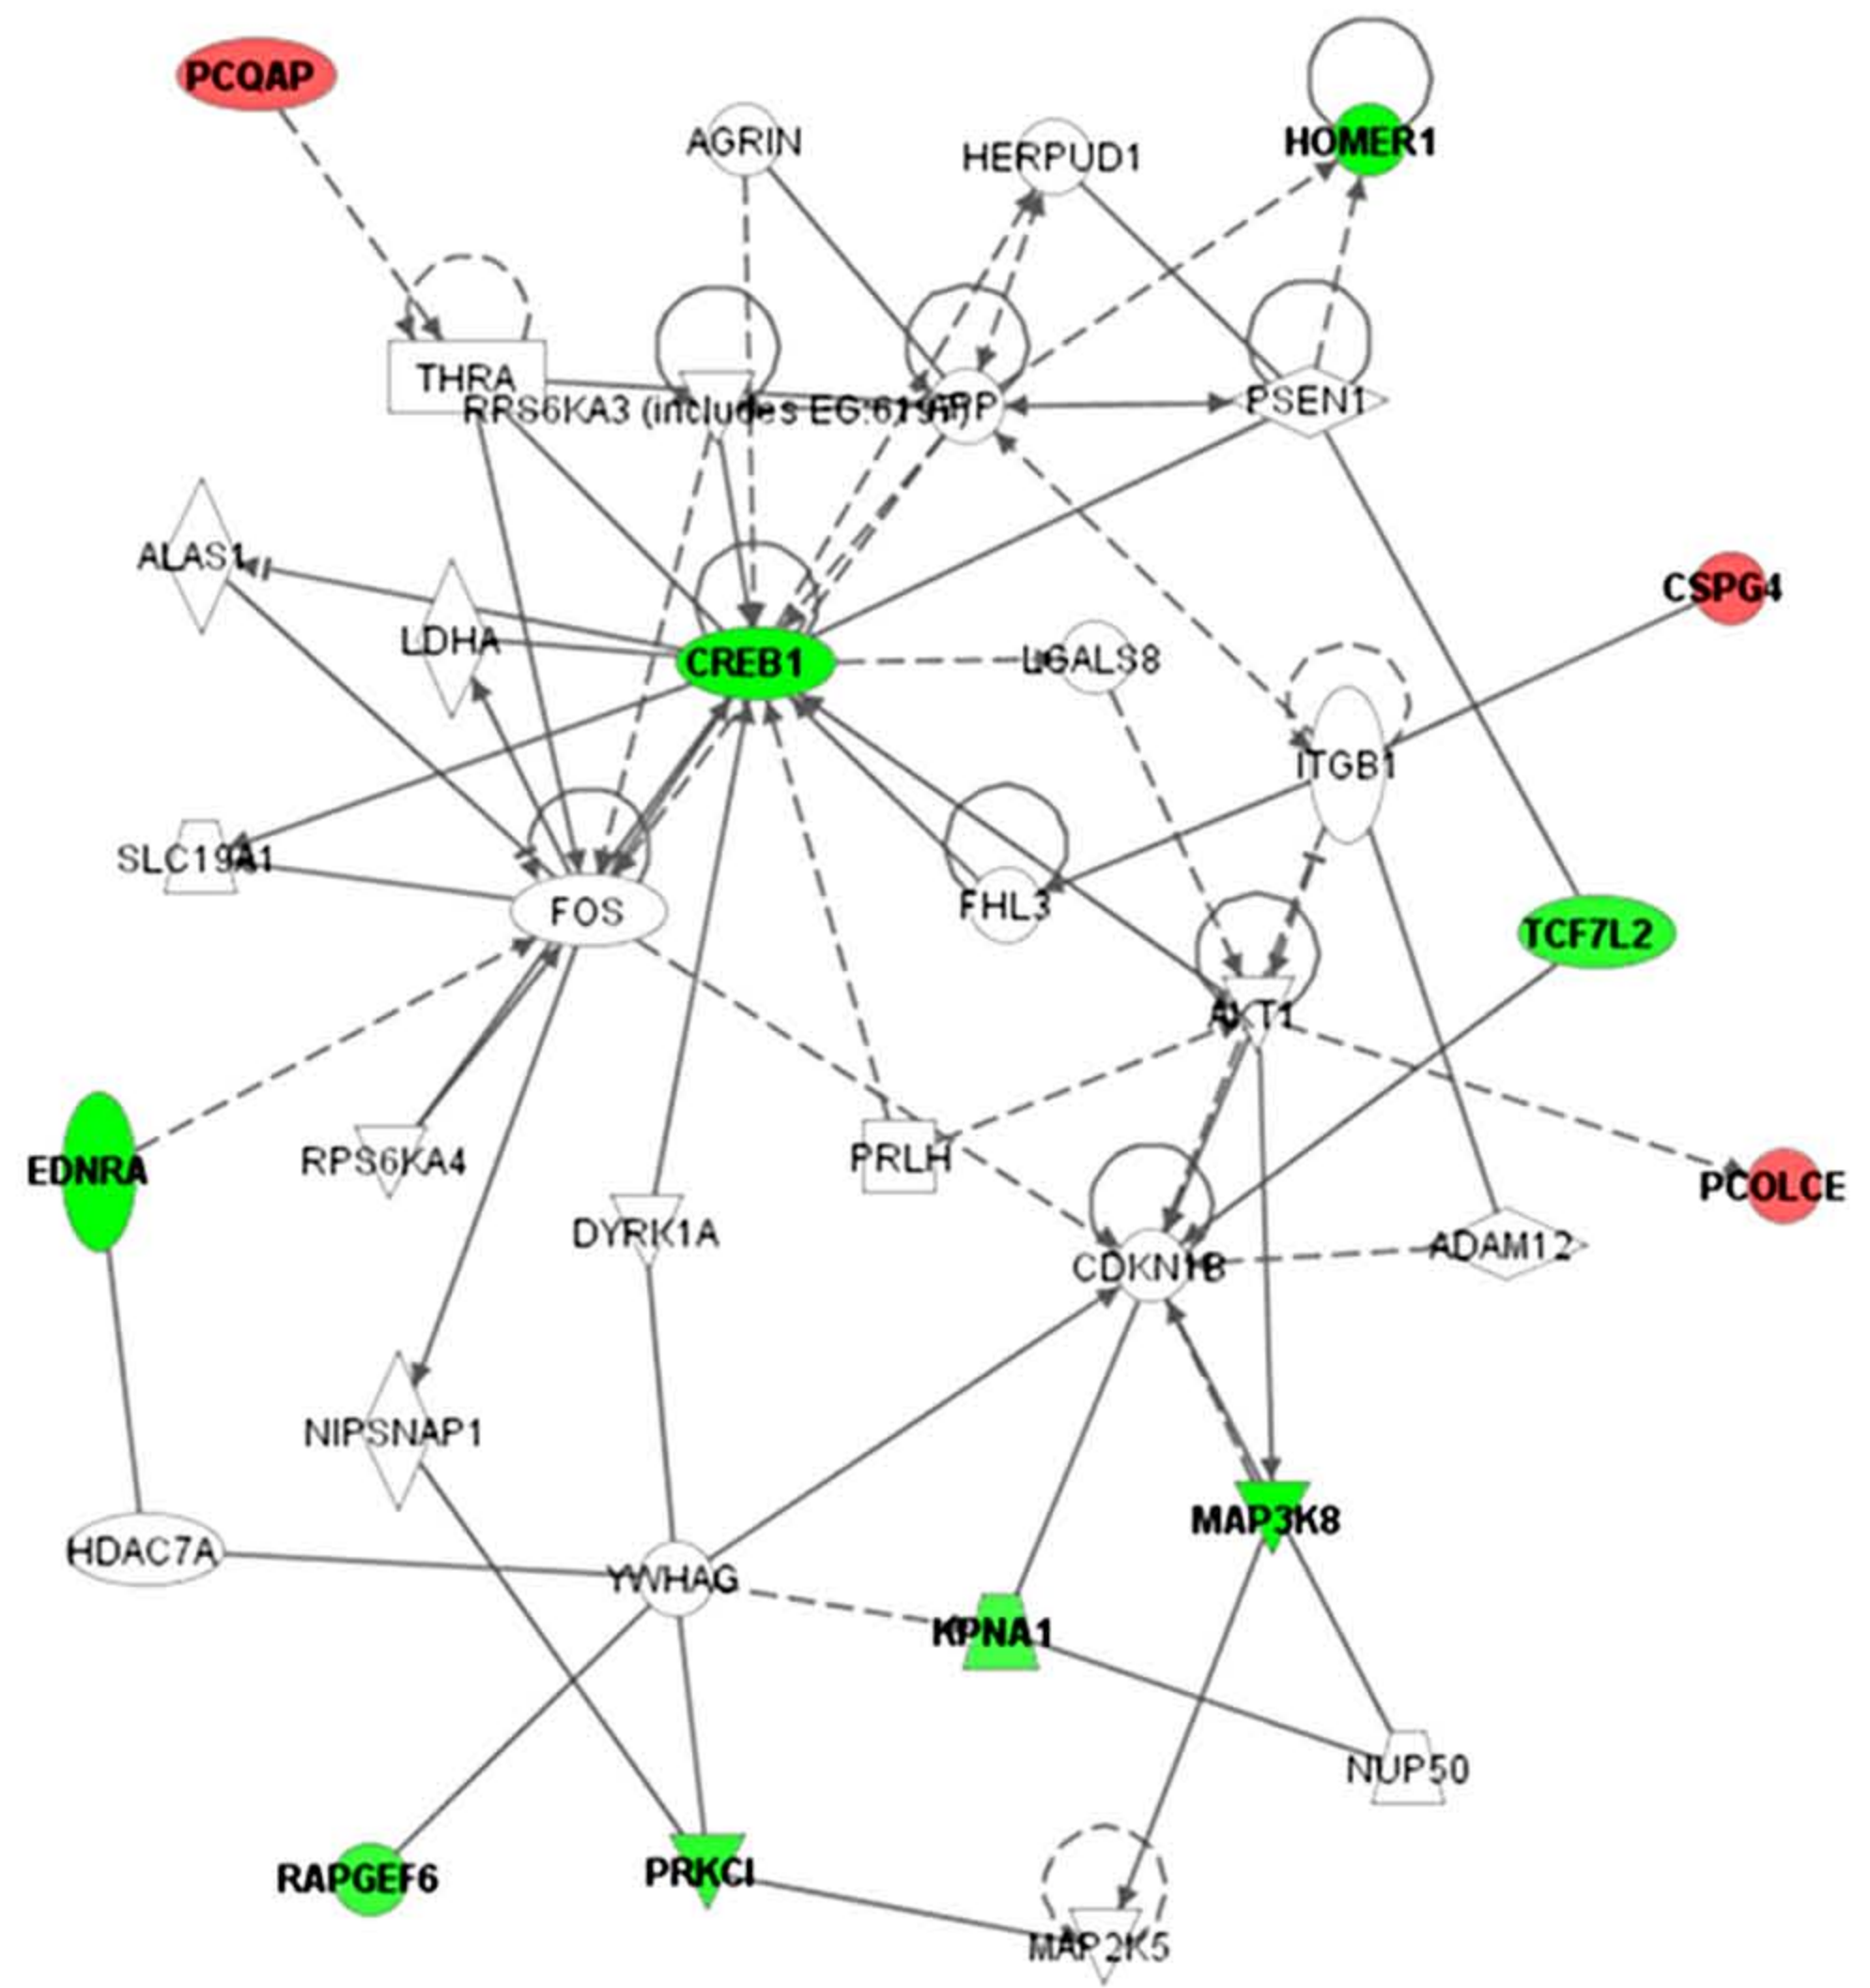

Suppl.Fig.6: Gene networks common in vitamin-E and combination-treated stromal samples

Supplement: djn512_7.pdf [file djn512_7.pdf]

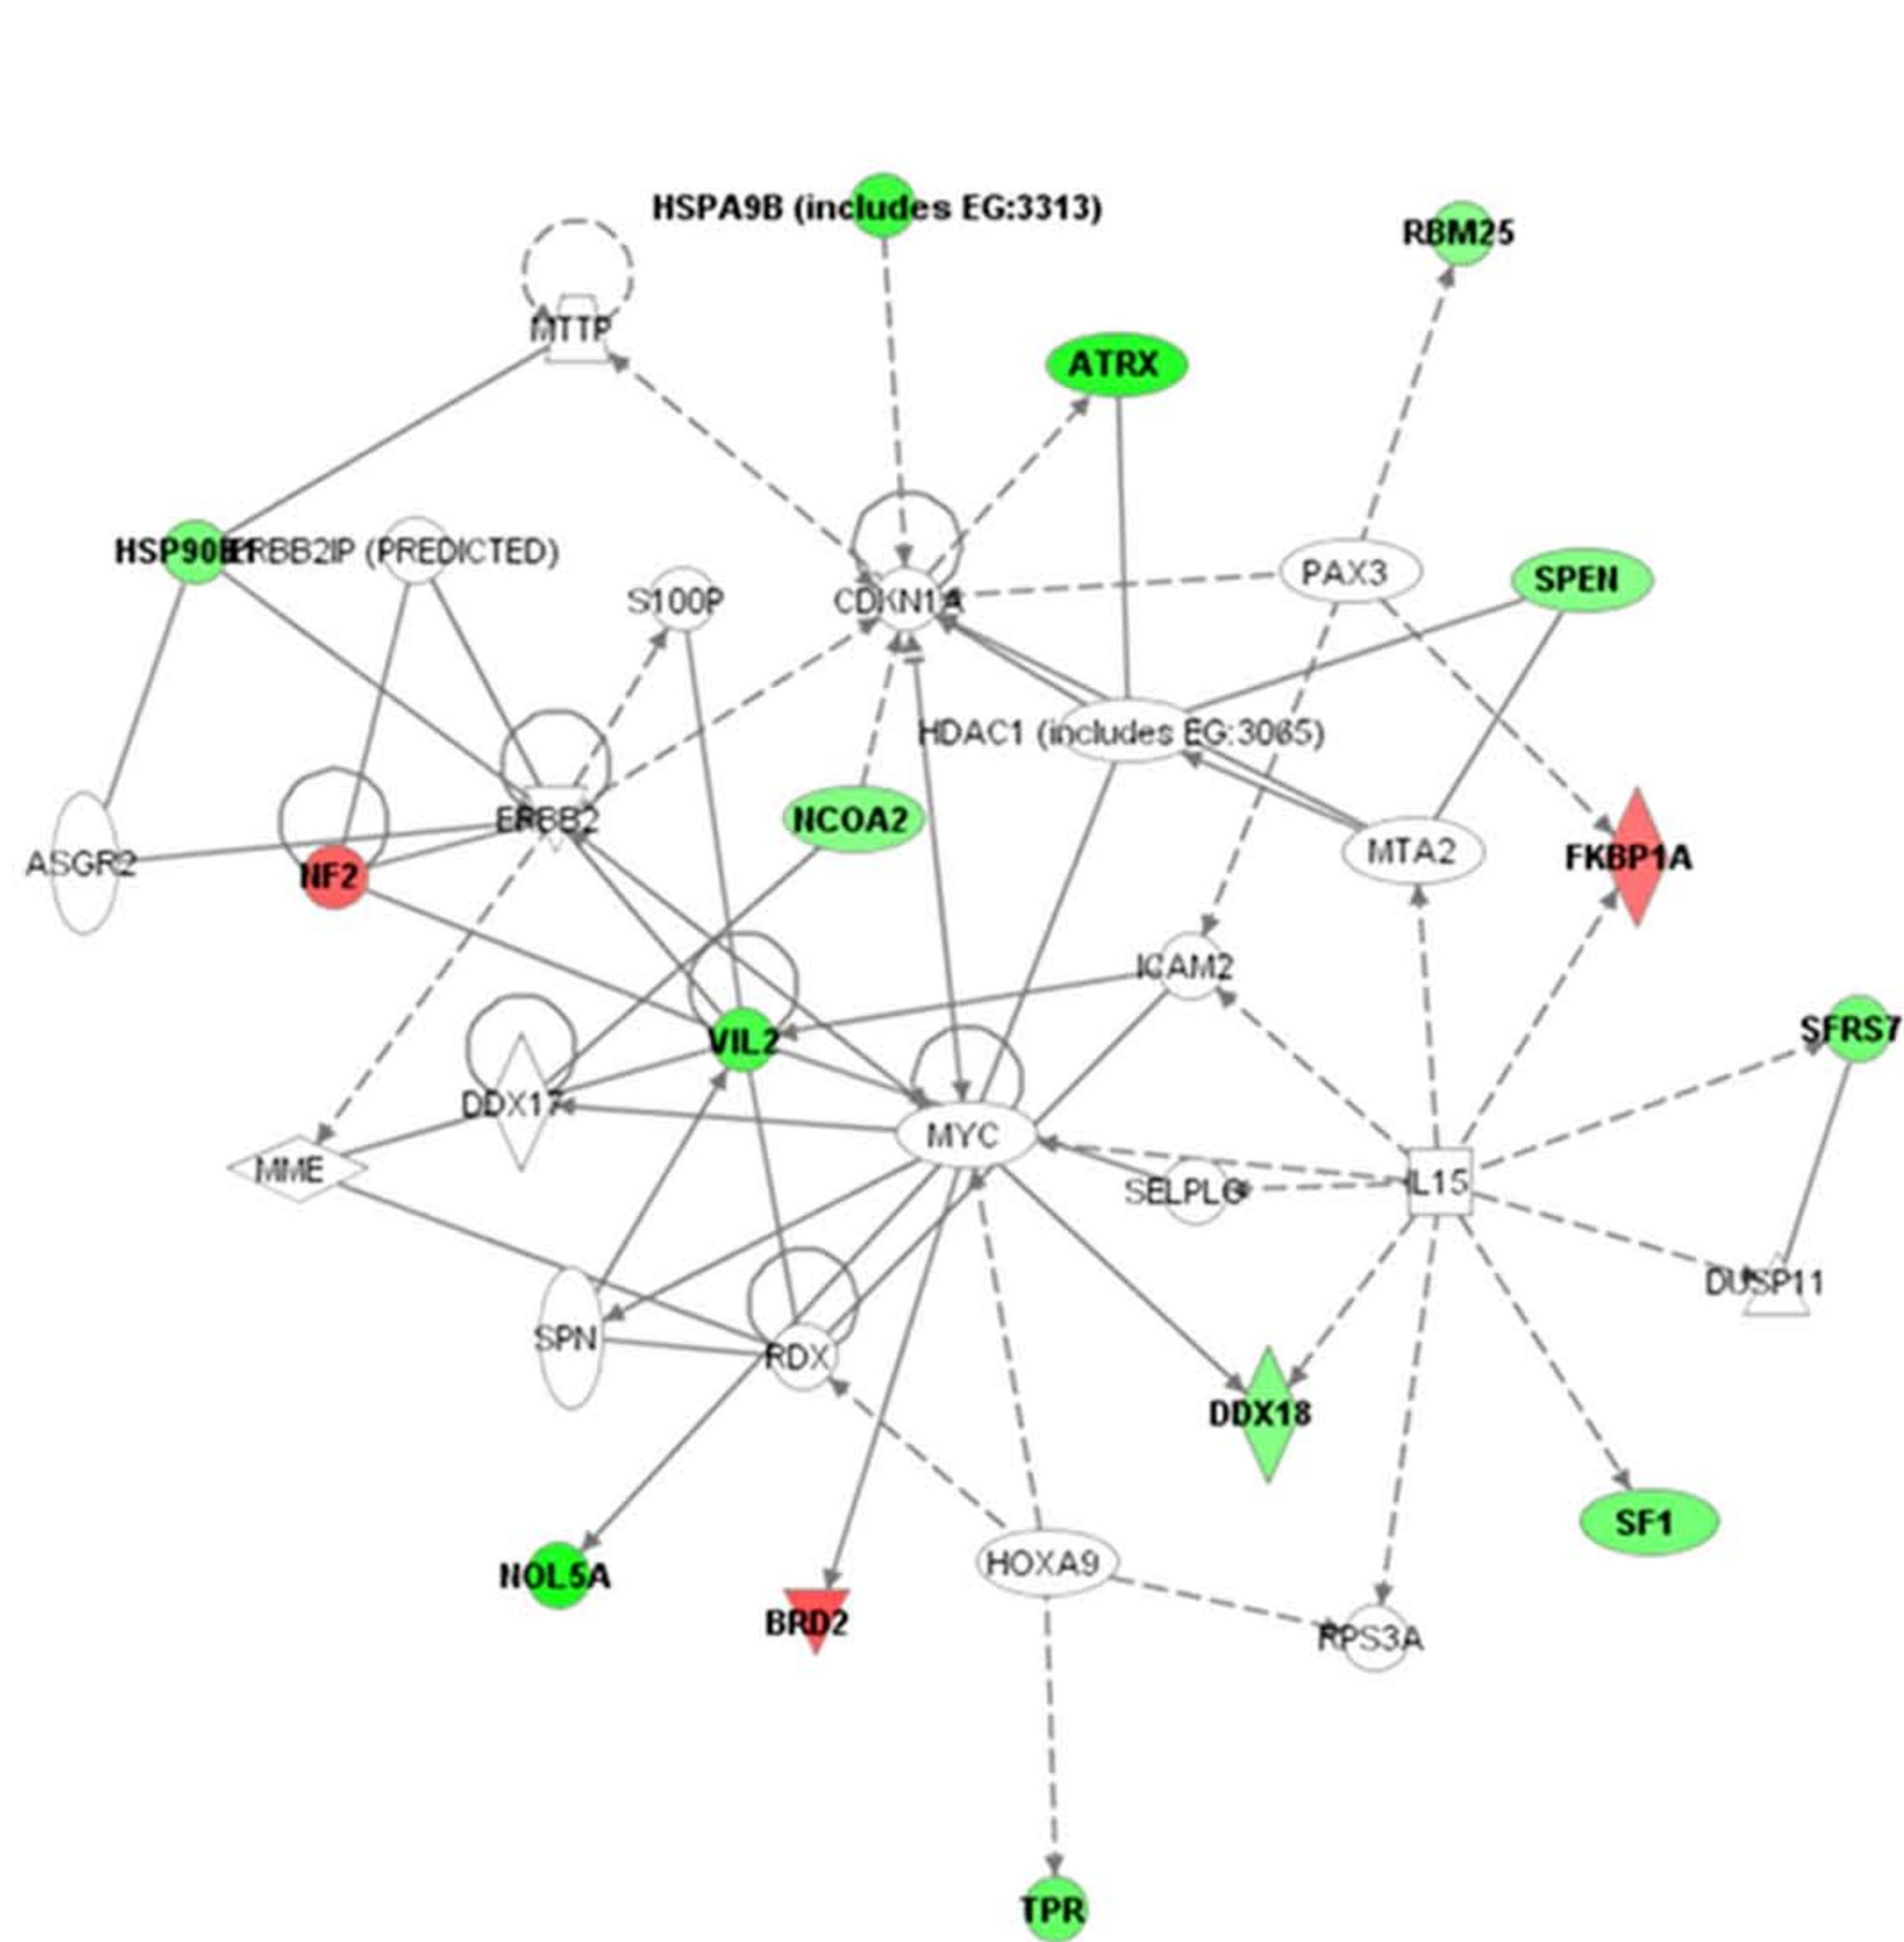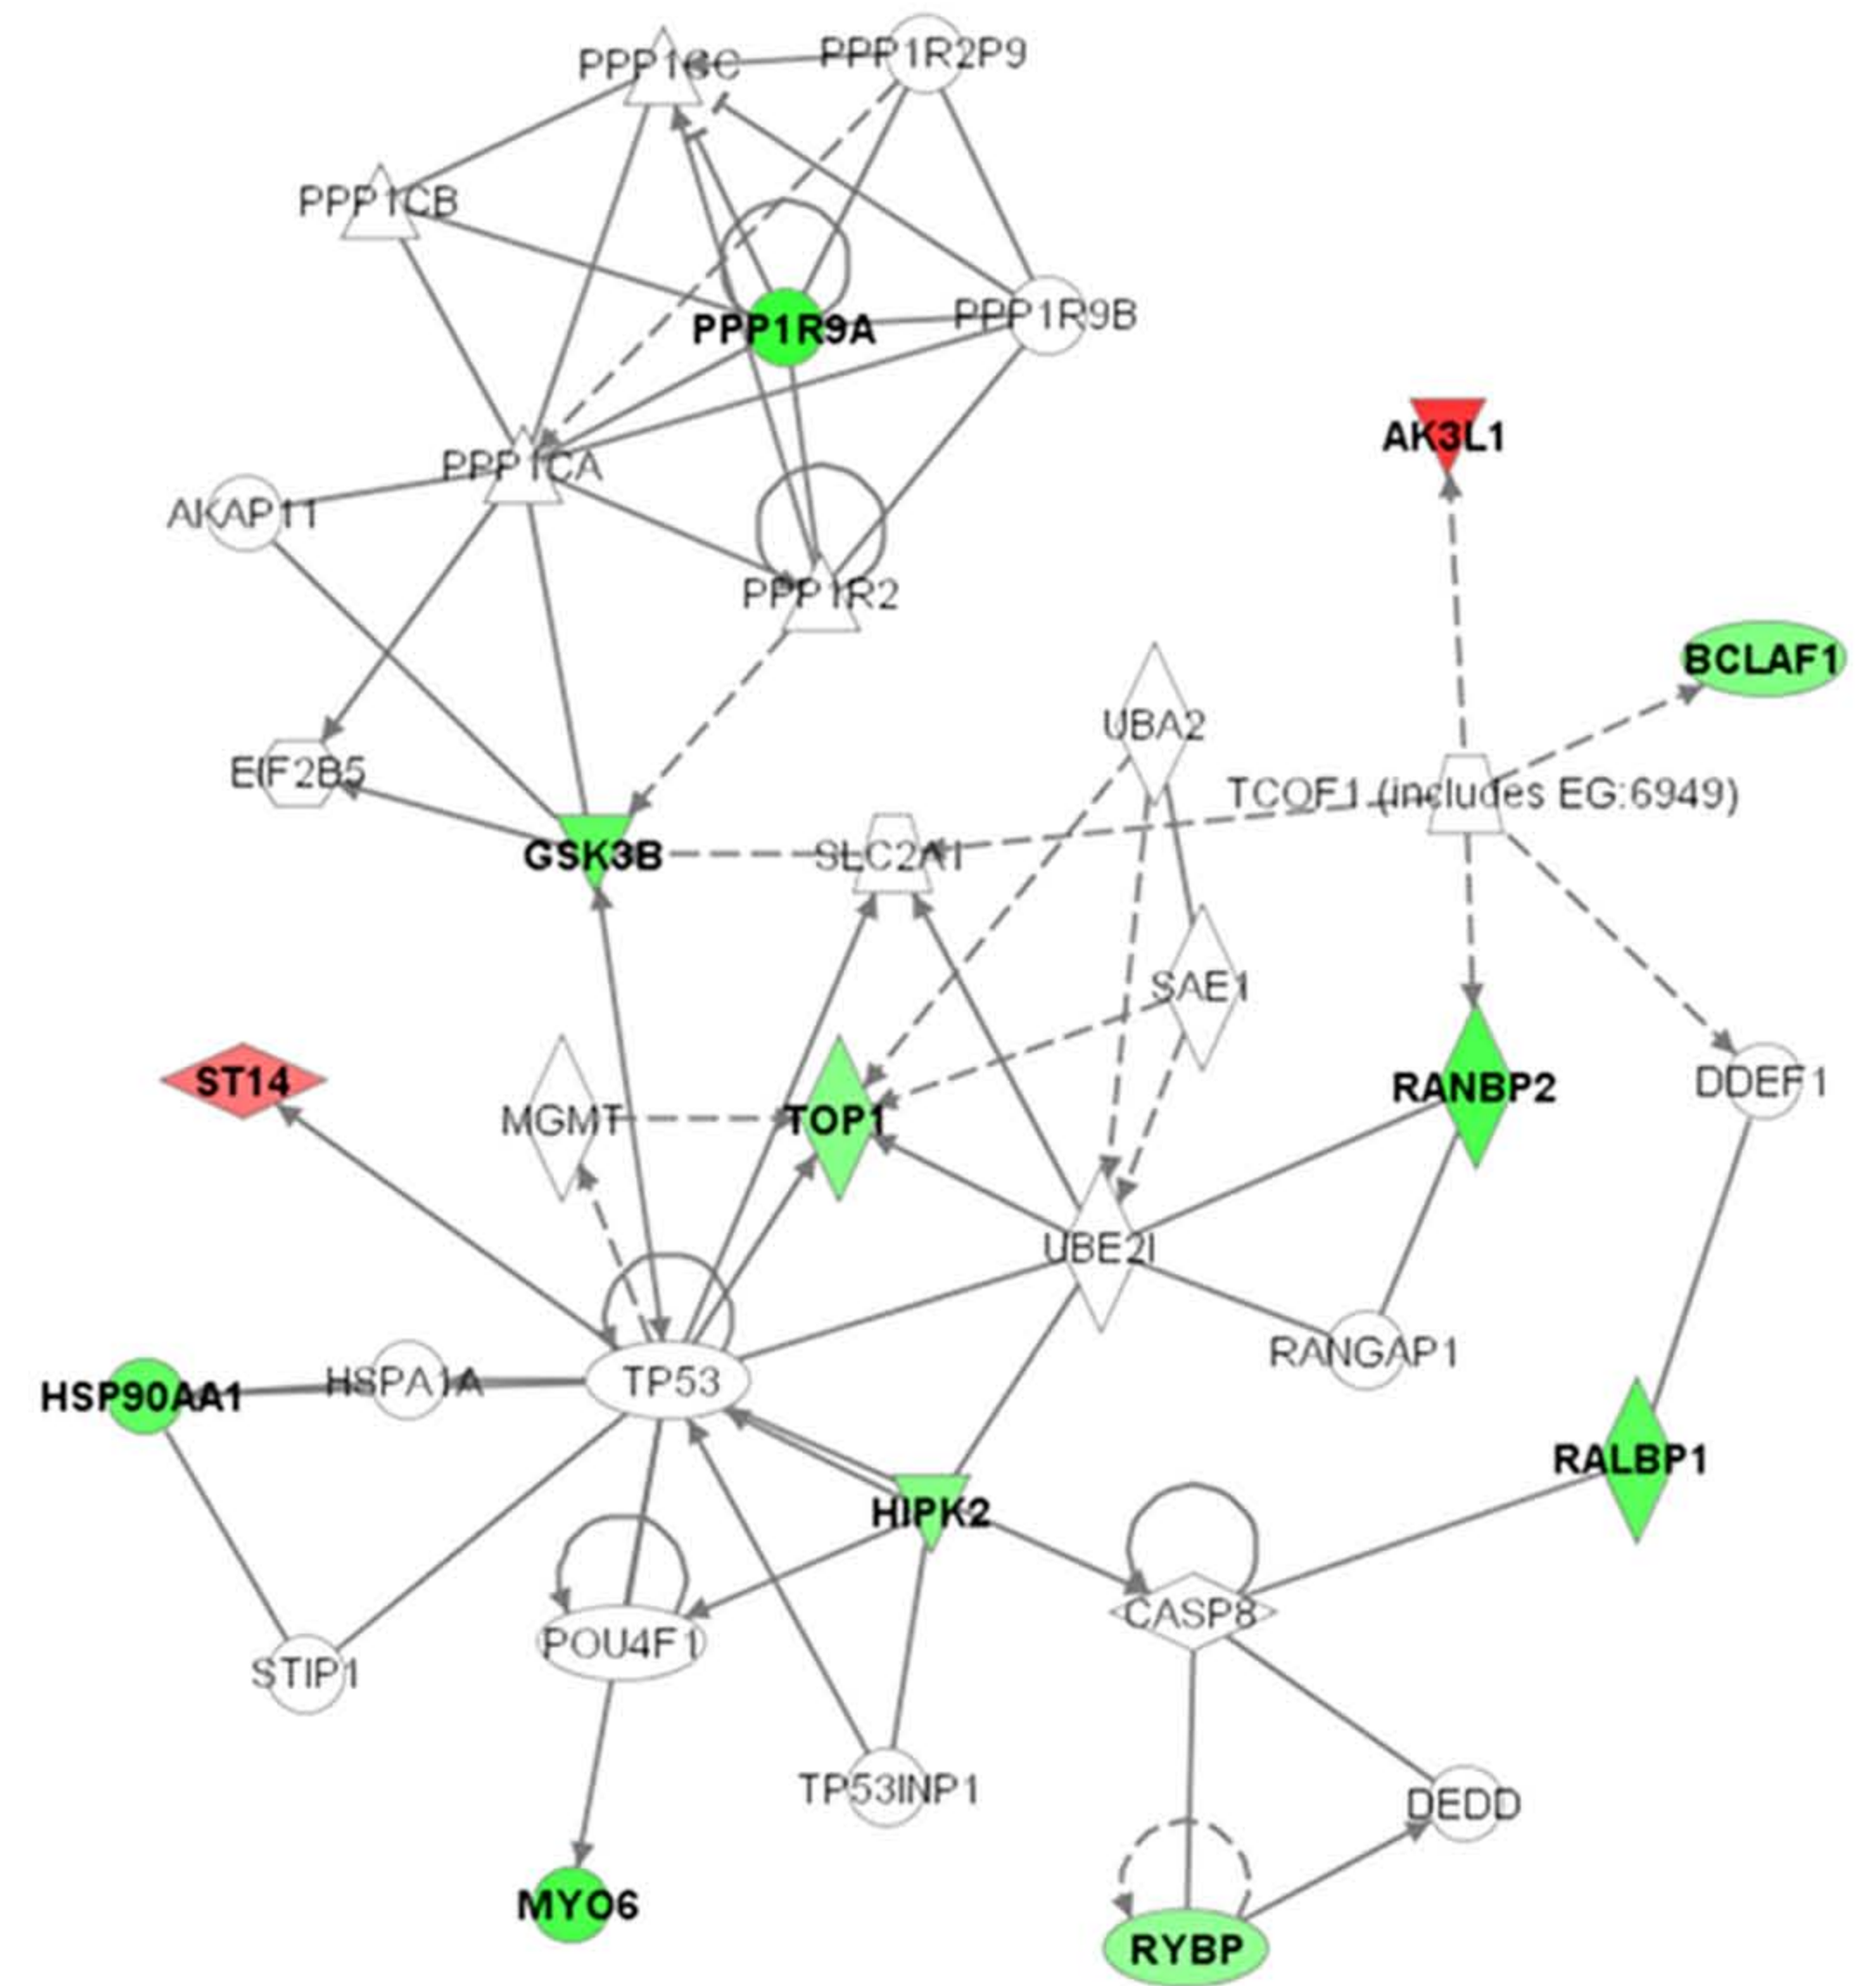

Suppl.Fig.7: Gene networks found common in selenium- and combination-treated tumor samples

Supplement: djn512_8.pdf [file djn512_8.pdf]

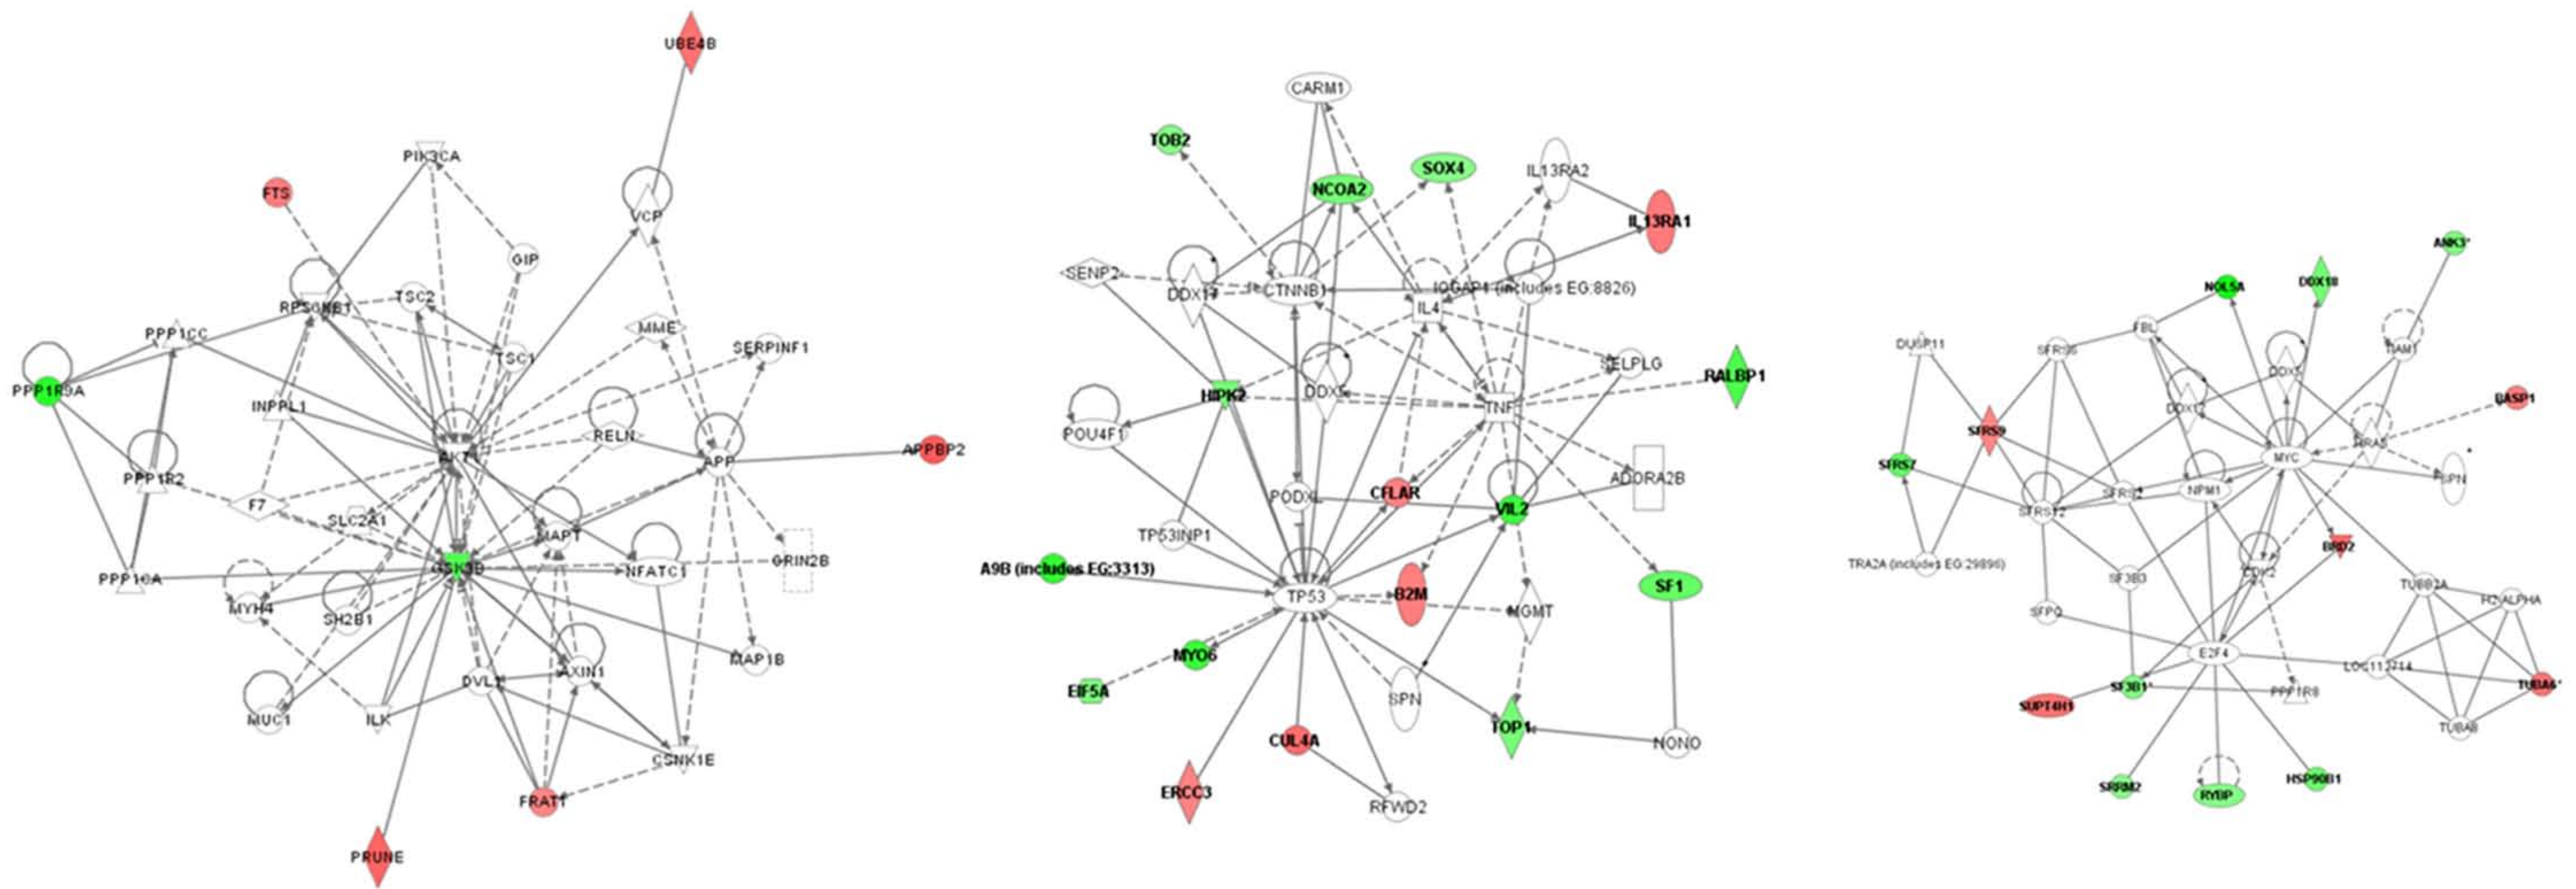

Suppl.Fig.8: Gene networks found common in vitamin E- and combination- treated tumor samples

Supplement: djn512_9.pdf [file djn512_9.pdf]
